1 TITLE: Target enrichment and extensive population sampling help untangle the recent, rapid  
2 radiation of *Oenothera* sect. *Calylophus*

3  
4 RUNNING HEAD: Cooper et al., Phylogenomics of *Oenothera* sect. *Calylophus*

5  
6 AUTHORS

7 Benjamin J. Cooper<sup>1,2,\*</sup>, Michael J. Moore<sup>3</sup>, Norman A. Douglas<sup>4</sup>, Warren L. Wagner<sup>5</sup>, Matthew  
8 G. Johnson<sup>1,6</sup>, Rick P. Overson<sup>1,7</sup>, Angela J. McDonnell<sup>1</sup>, Jeremie B. Fant<sup>1,2</sup>, Krissa A. Skogen<sup>1,2</sup>,  
9 Norman J. Wickett<sup>1,2,\*</sup>

10

11 <sup>1</sup>The Negaunee Institute for Plant Conservation Science and Action, Chicago Botanic Garden,  
12 1000 Lake Cook Rd., Glencoe, IL 60022

13 <sup>2</sup>Northwestern University, Program in Plant Biology and Conservation, O.T. Hogan Hall, Room  
14 6-140B, 2205 Tech Drive, Evanston, IL 60208

15 <sup>3</sup>Oberlin College, Department of Biology, 119 Woodland St., Oberlin, OH 44074

16 <sup>4</sup>Department of Biology, University of Florida, Gainesville, FL 32611

17 <sup>5</sup>Department of Botany, MRC-166, Smithsonian Institution, PO Box 37012, Washington, DC  
18 20013-7012

19 <sup>6</sup>Department of Biological Sciences, Texas Tech University, Box 43131 Lubbock, TX 79409

20 <sup>7</sup>School of Sustainability, Arizona State University, PO Box 875502, Tempe, AZ 85287-5502

21 \* Authors for correspondence: [nwickett@chicagobotanic.org](mailto:nwickett@chicagobotanic.org), [benjamin.cooper06@gmail.com](mailto:benjamin.cooper06@gmail.com)

22

23 ABSTRACT

24

25 *Oenothera* sect. *Calylophus* is a North American group of 13 recognized taxa in the  
26 evening primrose family (Onagraceae) with an evolutionary history that may include  
27 independent origins of bee pollination, edaphic endemism, and permanent translocation  
28 heterozygosity. Like other groups that radiated relatively recently and rapidly, taxon boundaries  
29 within *Oenothera* sect. *Calylophus* have remained challenging to circumscribe. In this study, we  
30 used target enrichment, flanking non-coding regions, summary coalescent methods, tests for  
31 gene flow modified for target-enrichment data, and morphometric analysis to reconstruct  
32 phylogenetic hypotheses, evaluate current taxon circumscriptions, and examine character  
33 evolution in *Oenothera* sect. *Calylophus*. Because sect. *Calylophus* comprises a clade with a  
34 relatively restricted geographic range, we were able to comprehensively sample across the range  
35 of geographic and morphological diversity in the group with extensive sampling. We found that  
36 the combination of exons and flanking non-coding regions led to improved support for species  
37 relationships. We reconstructed potential hybrid origins of some accessions and note that if  
38 processes such as hybridization are not taken into account, the number of inferred evolutionary  
39 transitions may be artificially inflated. We recovered strong evidence for multiple origins of the  
40 evolution of bee pollination from the ancestral hawkmoth pollination, the evolution of edaphic  
41 specialization on gypsum, and permanent translocation heterozygosity. This study applies newly  
42 emerging techniques alongside dense infraspecific sampling and morphological analyses to  
43 effectively address a relatively common but recalcitrant problem in evolutionary biology.

44

45 *Keywords.*– Gypsum Endemism, Onagraceae, *Oenothera* sect. *Calylophus*, Pollinator Shift,  
46 Recent Radiation, Phylogenomics, Target Enrichment

## 47 INTRODUCTION

48

49 The challenges of reconstructing species histories for groups that arose through recent,  
50 rapid radiations are well established. Phylogenetic signal can be obscured by processes such as  
51 incomplete lineage sorting (ILS) and gene flow (Maddison and Knowles 2006; Knowles and  
52 Chan 2008; Christie and Knowles 2015), resulting in short branch lengths and conflicting gene  
53 tree topologies. Consequently, approaches that use few loci or concatenation may fail to resolve  
54 the most accurate species tree (Eckert and Carstens 2008; Leaché et al. 2014; Xi et al. 2014;  
55 Giarla and Esselstyn 2015). This may be particularly common in plants that are thought to have  
56 experienced rapid or recent radiation with ongoing hybridization and high levels of ILS, as is  
57 likely the case in the evening primrose genus *Oenothera* sect. *Calylophus* (Onagraceae). The  
58 application of target enrichment methods that efficiently sequence hundreds of nuclear loci,  
59 coalescent-based phylogenetic methods that account for ILS and gene flow, and extensive  
60 sampling of morphologically diverse populations across the geographic range may allow for  
61 more accurate representations of phylogenetic relationships in this group (Maddison and  
62 Knowles 2006; Knowles and Chan 2008; Knowles 2009; Mamanova et al. 2010; Lemmon et al.  
63 2012; Straub et al. 2012; Bryson et al. 2014; Weitemier et al. 2014; Mandel et al. 2014; Stephens  
64 et al. 2015; Johnson et al. 2016).

65 *Oenothera* sect. *Calylophus* is currently considered to comprise seven species (thirteen  
66 taxa) with a center of diversity in western Texas, southern New Mexico, and north-central  
67 Mexico (Fig. 1; Towner 1977; Turner and Moore 2014; Wagner, in press). Previous analyses  
68 suggest that *Oenothera* sect. *Calylophus* forms a well-supported, morphologically coherent clade  
69 with a relatively restricted geographic range (Towner 1977; Levin et al. 2004; Wagner et al.  
70 2007; Turner and Moore 2014; Wagner, in press). However, as with other groups that have  
71 experienced rapid radiations, taxon boundaries within *Oenothera* sect. *Calylophus* have been  
72 challenging to define, likely due to phenomena such as overlapping morphological boundaries,  
73 ongoing introgression, and incomplete lineage sorting.

74 In the most comprehensive study of the group to date, Towner (1977) circumscribed taxa  
75 using morphology, breeding system, geography, and ecology, but it was noted (and our field  
76 observations confirm) that characters often overlap among taxa (Towner 1977). Taxa within  
77 *Oenothera* sect. *Calylophus* are divided into two easily recognizable subsections: subsect.  
78 *Salpingia* and subsect. *Calylophus* (Towner 1977; Wagner et al. 2007). Pollination varies  
79 between the two subsections; flowers of subsect. *Salpingia* are adapted to vespertine pollination  
80 by hawkmoths, except for *O. tubicula*, which opens in the morning and is primarily pollinated by  
81 bees (Towner 1977). Taxa in subsect. *Calylophus* are predominantly bee-pollinated (Towner  
82 1977) and have geographic ranges that partially (or even largely) overlap, resulting in occasional  
83 morphologically intermediate populations (Towner 1977). While confounding for  
84 morphological-based analyses, this observed pattern of reticulation is consistent with a recent,  
85 rapid radiation occurring in parallel with climatic fluctuations and increasing aridity in the region  
86 since the Pleistocene (Raven 1964; Towner 1977; Nason et al. 2002; Katinas et al. 2004).  
87 Hawkmoth pollination, which is ancestral in the family Onagraceae, and common in *Oenothera*  
88 sect. *Calylophus*, is known to result in long-distance pollen movement (Stockhouse 1973;  
89 Skogen et al. 2019); therefore, gene flow may have been extensive over the evolutionary history  
90 of hawkmoth-pollinated taxa, increasing the chances that processes such as historical  
91 introgression may obscure phylogenetic signal in extant plants (Elrich and Raven 1969). With a

92 phylogenomic approach that samples hundreds of nuclear loci, we may better illuminate both the  
93 history of these species and the key evolutionary processes related to speciation in this group.

94 Understanding speciation in angiosperms remains a fundamental question in evolutionary  
95 biology (Barrett et al. 1996; Rajakaruna 2004; van der Niet et al. 2006; Wilson et al. 2007;  
96 Crepet and Niklas 2009; Peakall et al. 2010; Xu et al. 2011; Van der Niet and Johnson 2012;  
97 Boberg et al. 2014). Section *Calylophus* has an evolutionary history that likely involves changes  
98 in reproductive systems (pollinator functional group, breeding system, and autogamy) and  
99 edaphic endemism. For example, there are thought to be two independent shifts between  
100 pollinators in the section from hawkmoth to bee pollination (Towner 1977; Fig. 1b), despite  
101 many studies in other plant groups showing a directional bias in shifts from bee to hummingbird  
102 or hawkmoth pollination (Barrett et al. 1996; Wilson et al. 2007; Thomson and Wilson 2008;  
103 Tripp and Manos 2008; Barrett 2013). However, pollinator shifts that do not follow this sequence  
104 may be more likely when the extent of trait divergence and specialization does not completely  
105 inhibit secondary pollinators such as bees, as has been suggested in *Oenothera* sect. *Calylophus*  
106 (Stebbins 1970; Tripp and Manos 2008; Van Der Niet et al. 2014). Shifts to autogamy are also  
107 frequent across angiosperms and in Onagraceae alone there are an estimated 353 shifts to modal  
108 autogamy (Raven 1979). *Oenothera* sect. *Calylophus* also includes at least one autogamous  
109 species, *O. serrulata*, which exhibits permanent translocation heterozygosity, a phenomenon in  
110 which all chromosomes are translocationally heterozygous (PTH; Towner 1977) (Fig. 1b). While  
111 the evolution of PTH has been assessed in molecular phylogenetic analyses across Onagraceae  
112 (Johnson et al. 2009), no study to date has examined this transition in a well-sampled clade with  
113 extensive population sampling. Lastly, abiotic ecological factors such as edaphic specialization  
114 are also known to drive speciation in some groups (Rajakaruna 2004; van der Niet et al. 2006).  
115 For example, serpentine endemics represent ~10% of the endemic flora in California even  
116 though serpentine soils account for about 1% of terrestrial habitat in the state (Brady et al. 2005).  
117 Similarly, the Chihuahuan Desert is comprised of numerous isolated islands of gypsum outcrops  
118 and current estimates suggest that at least 235 taxa from 36 different plant families are gypsum  
119 endemics (Moore and Jansen 2007; Moore et al. 2014). It is suspected that gypsum endemism  
120 has also evolved independently in *Oenothera* sect. *Calylophus* at least twice (Towner 1977;  
121 Turner and Moore 2014; Fig. 1b). Ultimately, to understand the role that these transitions have  
122 played in shaping the diversity of *Oenothera* sect. *Calylophus*, a robust phylogeny is required.

123 Here, we use target enrichment, summary coalescent methods, and morphometric  
124 analyses to reconstruct a phylogenetic hypothesis, examine previous taxonomic concepts, and  
125 resolve the history of pollinator shifts, PTH, and gypsum endemism in *Oenothera* sect.  
126 *Calylophus*. Target enrichment is a cost-effective method for sequencing hundreds of loci across  
127 hundreds of samples, producing highly informative datasets for phylogenetics (Lemmon et al.  
128 2012; Straub et al. 2012; Mandel et al. 2014; Weitemier et al. 2014; Heyduk et al. 2015;  
129 Stephens et al. 2015; Johnson et al. 2016). While target enrichment is generally designed to  
130 capture coding regions, a significant proportion of flanking non-coding regions can be recovered  
131 (the “splash-zone”; Weitemier et al. 2014). The inclusion of non-coding regions may be  
132 particularly informative for recent radiations, since these regions are less constrained by selective  
133 pressures and may contain on average more informative sites at shallower time scales (Folk et al.  
134 2015). We included these “splash-zone” regions in our sequence alignments to evaluate their  
135 impact on reconstructing lower-order relationships. Importantly, we sampled extensively,  
136 including individuals from numerous populations across the geographic and morphological  
137 ranges of all thirteen taxa in the section (Fig. 1a). This study presents an example of how

138 combining these molecular techniques with dense sampling and morphological analysis can be  
139 used to effectively address a common problem in evolutionary biology.

140

## 141 METHODS

142

143 A total of 194 individuals spanning the geographic, morphological, and ecological ranges  
144 of all 13 recognized taxa in *Oenothera* sect. *Calylophus* [following Towner (1977) and Turner  
145 and Moore (2014)] were included in this study (Fig. 1a, S1, S2) along with eight outgroups  
146 representing other major sections of *Oenothera* (*Eremia*, *Gaura*, *Kneiffia*, *Lavauxia*, *Oenothera*,  
147 *Pachylophus*, and *Ravenia*) and other genera (*Chylismia* and *Eulobus*) in Onagraceae (S1, S2).  
148 DNA was extracted from fresh, silica-dried leaf tissue (S3). staiPTH status was determined for  
149 individuals in subsect. *Calylophus* by assessing pollen fertility, when flowers were present, using  
150 a modified Alexander stain (Alexander 1969, 1980; S3).

151 Target nuclear loci for enrichment were determined by clustering transcriptome  
152 assemblies of *Oenothera serrulata* (1KP accession SJAN) and *Oenothera berlandieri* (1KP  
153 accession EQYT). Starting with the 956 phylogenetically informative *Arabidopsis* loci identified  
154 by Duarte et al. (2010; S3), we identified 322 homologous, single-copy loci in our clusters and  
155 used these in the probe design process. Libraries were enriched for these loci using the MyBaits  
156 protocol (Arbor Biosciences, Ann Arbor, MI, USA) and sequenced on an Illumina MiSeq (2 x  
157 300 cycles, v3 chemistry; Illumina, Inc., San Diego, California, USA). Raw reads have been  
158 deposited at the NCBI Sequence Read Archive (BioProject PRJNA544074; See S3 for details).  
159 Reads were trimmed using Trimmomatic (Bolger et al. 2014; S3) and trimmed, quality-filtered  
160 reads were assembled using HybPiper (Johnson et al. 2016). From the assembled loci, we  
161 produced two datasets: “**exons**” – exon-only alignments, and “**supercontig**” – alignments  
162 containing the exon alignment and flanking non-coding regions (the “splash-zone” per  
163 Weitemier 2014 and reconstructed using supercontigs produced by HybPiper). We used these  
164 two datasets to test the most recent taxonomic circumscription of the group with several  
165 methods: (1) phylogenetic inference of concatenated alignments using RAxML (Stamatakis  
166 2014; two analyses: exons and supercontigs), (2) ASTRAL-II (Mirarab and Warnow 2015;  
167 Sayyari and Mirarab 2016) species tree inference (two analyses: exons and supercontigs), (3)  
168 SVD Quartets (Chifman and Kubatko 2014, 2015) species tree inference (one analysis:  
169 supercontigs), (4) Phyparts (Smith et al. 2015; one analysis: supercontigs), (5) IQtree (Minh et  
170 al. 2018) with both gene and site concordance factors (one analysis: supercontigs).

171 We used HyDe (Blischak et al. 2018) to test for putative hybrid origins of selected taxa  
172 and accessions by calculating D-Statistics (Green et al. 2010) for a set of hypotheses (S3). To  
173 further characterize population-level processes or genetic structure within sect. *Calylophus*, we  
174 extracted and filtered SNPs by mapping individual reads against reference supercontigs (see  
175 <https://github.com/lindsawi/HybSeq-SNP-Extraction>) and used Discriminant Analysis of  
176 Principal Components (Jombart et al. 2010) as implemented in the R package *adegenet* (Jombart  
177 2008) and the *snmf* function in the LEA package (Frichot and François 2015) in R (R Core  
178 Team, 2020; S3). We evaluated current taxonomic concepts and patterns of morphological  
179 variation by measuring character states for morphological structures that have been used  
180 historically to discriminate taxa in *Oenothera* sect. *Calylophus* (Towner 1977): Plant height, leaf  
181 length (distal), leaf width (distal), leaf length/width ratio (distal), leaf length (basal), leaf width  
182 (basal), leaf length/width (basal), sepal length, and sepal tip length (S3). Measurements were  
183 made for 125 of the sequenced samples (S11); unfortunately, we were unable to measure all

184 traits for 73 samples because we did not have access to the herbarium vouchers, or the trait of  
185 interest was not captured on the voucher, therefore some samples were dropped from the analysis  
186 due to missing values. Finally, the number of transitions and inferred ancestral conditions of  
187 reproductive system were mapped onto an ASTRAL species tree, with individuals grouped into  
188 species, using the stochastic mapping function in the R package *phangorn* version 2.5.5 (Schliep  
189 2011; S3).

190

## 191 RESULTS AND DISCUSSION

192

### 193 *Sequencing and Phylogenetic Results*

194 Sequencing resulted in a total of 80,273,296 pairs of 300-bp reads with an average of  
195 625,323 reads per sample. Following quality filtering, assembly and alignment, we recovered  
196 204 loci that were present in at least 70% of the samples. Across all datasets and analyses,  
197 *Oenothera* sect. *Calylophus* was monophyletic. At the subsection level there was strong  
198 agreement in topology between concatenation and coalescent-based trees. For example, subsect.  
199 *Calylophus* was recovered as sister to subsect. *Salpingia* with strong support across all analyses  
200 and *O. toumeyi* [considered by Towner (1977) to be in subsection *Salpingia*; Fig. 2, S4-7] was  
201 recovered as sister to subsect. *Calylophus* across all trees, with strong bootstrap support. Within  
202 subsect. *Calylophus* there was poor resolution for currently recognized taxa in all analyses,  
203 whereas taxon relationships were better resolved in subsect. *Salpingia* (Fig. 2, S4-7). With  
204 coalescent-based tree reconstruction, most taxa *sensu* Towner (1977) were recovered as  
205 monophyletic with moderate to strong support (Fig. 2, S6-8). In contrast, both the exon and  
206 supercontig concatenation trees recovered most currently recognized taxa as non-monophyletic  
207 (S4, S5). Given that concatenation has been shown to produce incorrect topologies in the  
208 presence of high ILS (Roch and Steel 2015) and that *Oenothera* sect. *Calylophus* underwent  
209 recent radiation, we believe the paraphyly of taxa in both concatenation trees might be  
210 artifactual. We, therefore, prefer to interpret relationships based on our coalescent-based trees,  
211 which comprise the focus for the remainder of the paper (Fig. 2, S6-8).

212 To understand whether summary coalescent relationships display a consistent signal  
213 across the genome, we quantified gene tree and site concordance using Phyparts and IQtree. We  
214 found that gene tree concordance was highest at the deepest nodes at the species level where we  
215 expected less ILS and more time between speciation events (Fig. 2, S8, S9). Correspondingly,  
216 gene tree concordance was lowest at the subspecies level where increased sharing of ancestral  
217 alleles and ongoing gene flow are more likely (Fig. 2, S8, S9). For example, within *O. hartwegii*  
218 less than 1% of genes were concordant for bifurcations representing all currently recognized taxa  
219 at the subspecies level (Fig. 2, S8, S9). For species-level nodes with high support and high gene  
220 tree concordance, site concordance was also high; for example, *O. lavandulifolia* had high  
221 bootstrap support in summary coalescent trees (BS = 100), high gene tree concordance (Phyparts  
222 = 94% concordance, gCF = 74), and high site concordance (sCF = 83; Fig. 2, S9h). For  
223 subspecies with high support, but low gene tree concordance, site concordance was moderate.  
224 For example *O. hartwegii* subsp. *fendleri* had high bootstrap support (BS = 99), low gene tree  
225 concordance (Phyparts = <1% concordance, gCF = 1), and moderate site concordance (sCF = 38;  
226 Fig. 2, S9b). For subspecies that were monophyletic in our coalescent-based trees, but that had  
227 low support and low gene tree concordance, site concordance was moderate with an average of  
228 35% of sites in agreement for taxa at these nodes (S9[c,f,g,v]). For example *O. hartwegii* subsp.  
229 *filifolia* had low bootstrap support, low gene tree concordance (Phyparts = <1% concordance,

230 gCF = 0), and moderate site concordance (sCF = 36; Fig. 2, S9c). This is an important finding  
231 because while individual gene histories can be obscured by ILS, site concordance factors, which  
232 may be less constrained and less subject to ILS at shallower evolutionary timescales, provide a  
233 key alternative method of support.

234 In general, topologies of exon and supercontig datasets were similar, with no major  
235 differences in clade membership, but the inclusion of the splash-zone increased support at  
236 shallow nodes in our trees. However, this trend was not universal. For example, in subsect.  
237 *Salpingia*, using the supercontig dataset decreased support slightly for one taxon (*O. hartwegii*  
238 subsp. *filifolia*), and in subsect. *Calylophus* it led to paraphyly of another (*O. capillifolia* subsp.  
239 *capillifolia*). For six other taxa, our results showed that using supercontigs increased bootstrap  
240 support. Therefore, these results demonstrated a net benefit of including flanking non-coding  
241 regions for resolving relationships among closely related taxa.

242

### 243 *Hybridization and Geneflow*

244 Using concatenated loci from the supercontig dataset, we used HyDe (Blischak et al.  
245 2018) to test for signals of hybridization. We used 552,521 sites and tested 22 hypotheses for  
246 either individuals or groups suspected to be of hybrid origin based on field observations of  
247 morphological intermediacy, geographic location, and topological position in our coalescent-  
248 based trees and found evidence of hybridization in three individuals representing two taxa, both  
249 in subsect. *Salpingia*. The highest signal of hybridization, with a gamma value ( $\hat{\gamma}$ ) of .947  
250 suggesting more historic gene-flow, was observed in one individual of *O. tubicula* subsp.  
251 *strigulosa* (MJM1916.E). This involved admixture between *O. tubicula* subsp. *tubicula* and the  
252 clade consisting of *O. hartwegii* subsp. *hartwegii* and *O. hartwegii* subsp. *maccartii* (Z-score =  
253 5.585, p-value = 0.000,  $\hat{\gamma}$  = 0.947; Fig. 3a, S10). We also detected significant levels of  
254 hybridization, with  $\hat{\gamma}$  ranging from 0.332 to 0.338 suggesting more contemporary gene-flow, in  
255 two individuals in *O. hartwegii* subsp. *pubescens*, BJC29 (Z-score = 2.378, p-value = 0.009,  $\hat{\gamma}$  =  
256 0.338) and MJM594 (Z-score = 2.094, p-value = 0.018,  $\hat{\gamma}$  = 0.332). This more recent gene flow  
257 involved admixture between *O. hartwegii* subsp. *pubescens* and the clade consisting of *O.*  
258 *hartwegii* subsp. *hartwegii* and *O. hartwegii* subsp. *maccartii* (Fig. 3a, S10).

259 The finding that one individual of *O. tubicula* subsp. *strigulosa* may be of hybrid origin is  
260 consistent with ongoing gene flow between *O. tubicula* subsp. *strigulosa* and its sister taxon *O.*  
261 *tubicula* subsp. *tubicula*. In our coalescent-based analyses, the two subspecies of *O. tubicula*  
262 were not recovered as sister taxa, and this relationship was strongly supported (S9[j-k]). If the  
263 two *O. tubicula* taxa arose independently, this would support the hypothesis that bee pollination  
264 arose in *Oenothera* sect. *Calylophus* independently three times. However, while the summary  
265 coalescent analyses we utilized to estimate phylogenies accounted for ILS in tree estimation,  
266 they did not account for ongoing gene flow (Meng and Kubatko 2009; Gerard et al. 2011;  
267 Kubatko and Chifman 2019). Our HyDe results may support the hypothesis that *O. tubicula*  
268 subsp. *strigulosa* has experienced gene flow from two closely related taxa, and may have hybrid  
269 origins resulting from crossing between *O. tubicula* subsp. *tubicula* and *O. hartwegii* subsp.  
270 *hartwegii* (Fig. 3a, S10). Therefore, the placement of *O. tubicula* subsp. *strigulosa* as sister to the  
271 rest of the *O. hartwegii* species complex in our trees is likely the result of past gene flow and  
272 does not represent independent origins of bee pollination in subsect. *Salpingia*. These results  
273 underscore the importance of explicitly including tests for hybridization in phylogenetic studies. In  
274 the case of these data estimating a species tree given a set of gene trees within a coalescent

275 framework without considering other, non-ILS sources of signal conflict could artificially inflate  
276 the number of inferred evolutionary transitions.

277 Our HyDe results also suggest that at least some of the morphological intermediacy and  
278 overlap among taxa in the group is due to continued, or at least recent, gene flow. For example,  
279 both *O. hartwegii* subsp. *pubescens* individuals that are inferred to have significant levels of  
280 admixture were collected from morphologically intermediate populations of *O. hartwegii* subsp.  
281 *pubescens* and *O. hartwegii* subsp. *hartwegii*. In addition, *O. hartwegii* subsp. *hartwegii* was a  
282 parent in all three hybridization events (S10). Thus, gene flow may explain this taxon's non-  
283 monophyly in our summary coalescent results. However, despite the often confounding patterns  
284 of overlapping morphological variation among closely related taxa in subsect. *Salpingia*, this  
285 pattern does not necessarily appear to be the result of admixture, as many of the tests for  
286 hybridization based on field observations were not significant (Fig 3a, S10). What is also clear  
287 from these results is that much like collecting hundreds of nuclear genes provides a more  
288 nuanced picture of phylogenetic signal and taxon relationships, our results show that collecting  
289 multiple individuals from across the geographic and morphological ranges is necessary for a  
290 more complete picture of relationships among closely related taxa.

291 After filtering, we extracted a set of 9728 single nucleotide polymorphisms (SNPs) from  
292 both coding and non-coding regions. A Discriminant Analysis of Principal Components (DAPC;  
293 Fig. 3b) clearly distinguishes subsection *Salpingia* from subsection *Calylophus*, with *O. toumeyi*  
294 intermediate between the two, which is consistent with the phylogenetic results presented here.  
295 Additionally, the DAPC identifies *O. lavandulifolia* as a distinct genetic cluster from the  
296 remaining taxa in subsection *Salpingia*. The overlap between taxa, for example between the  
297 remaining taxa in subsection *Salpingia*, is consistent with the high levels of gene tree  
298 discordance identified by PhyParts (Fig. 3a). For this latter group of taxa, we computed estimates  
299 of ancestry coefficients using sNMF, which suggests a substantial amount of shared ancestral  
300 polymorphisms while also showing some evidence of clear genetic structure among taxa (Fig.  
301 3c). Consistent with the phylogenetic analyses, there does not appear to be any clear genetic  
302 distinction between *O. hartwegii* subsp. *hartwegii* and *O. hartwegii* subsp. *maccartii*, while *O.*  
303 *hartwegii* subsp. *fendleri*, *O. tubicula* subsp. *tubicula*, and *O. hartwegii* subsp. *filifolia* appear to  
304 be largely distinct.

305

### 306 *Morphological Analysis*

307 We conducted morphometric Principal Components Analysis (PCA) to determine if  
308 morphological patterns were consistent with phylogenetic results and to examine if specific  
309 characters could be used to diagnose taxa as circumscribed by our phylogenetic analysis. Towner  
310 (1977) observed overlapping and confounding patterns of morphological variation among taxa  
311 within subsections, as for example in the *O. hartwegii* species complex. Despite this, because  
312 some taxa (e.g., *O. hartwegii* subsp. *fendleri*) were strongly supported by our summary  
313 coalescent trees we expected that they would be well distinguished in morphometric analysis.

314 In general, we found that the main traits that separated taxa in subsect. *Salpingia* were leaf  
315 traits and plant size, while in subsect. *Calylophus* the main traits that separated taxa were sepal  
316 traits. In subsect. *Salpingia*, PC1 accounted for 44.2% of variance in PCA, while PC2 accounted  
317 for 28.1% (Fig. 4b). Morphological characters most associated with PC1 were leaf width (distal  
318 and basal), plant height, and leaf length/width ratio (distal and basal). Those associated with PC2  
319 were leaf length (distal and basal), sepal length, and sepal tip length (Fig. 4b). In subsect.  
320 *Calylophus*, PC1 accounted for 43.8% of explained variance and PC2 accounted for 27.4% (Fig.

321 4c). The characters most associated with PC1 in subsect. *Calylophus* include leaf length (distal  
322 and basal), sepal length, and sepal tip length. Those most associated with PC2 were leaf  
323 length/width ratio (distal and basal) and distal leaf width (Fig. 4c).

324 Our results support Towner's understanding of taxon boundaries by underscoring previous  
325 difficulties in identifying individuals in this group based on morphology. We found substantial  
326 overlapping morphological variation among currently recognized taxa in both subsections,  
327 though some taxa exhibited better grouping than others. The amount of overlap between taxa  
328 was not a function of the strength of tree support for a given taxon in our summary coalescent  
329 results. For example, *O. hartwegii* subsp. *fendleri*, a taxon that was well supported in our  
330 summary coalescent trees, exhibited some of the highest degree of overlap with other taxa in  
331 PCA space. Conversely, both *O. hartwegii* subsp. *filifolia* and *O. hartwegii* subsp. *pubescens*,  
332 two taxa that formed poorly supported clades in our trees, formed clusters on the outer edges of  
333 PCA space and had less overlap than other taxa (Fig. 4b). Interestingly, *O. hartwegii* subsp.  
334 *hartwegii*, the taxon that was identified as a parent in all three instances of admixture in our  
335 HyDe analysis, also overlaps in PCA with most other taxa in subsect. *Salpingia* (Fig. 4b). This is  
336 not surprising given that it is widely distributed in northern Mexico and western Texas, and  
337 frequently comes into contact with related taxa resulting in sympatric populations and occasional  
338 morphologically intermediate populations.

339

#### 340 *Implications for Reproductive Systems and Edaphic Endemism*

341 Our results show shifts from hawkmoth to bee pollination likely occurred twice in sect.  
342 *Calylophus* (S3) and thus may be more common in *Oenothera* than previously thought. The  
343 strongly supported sister relationship of *O. toumeyi* to remaining subsect. *Calylophus* in our  
344 summary coalescent results is consistent with two independent shifts, once in the ancestor of  
345 subsect. *Calylophus*, and another in subsect. *Salpingia* on the branch leading to *O. tubicula* (Fig.  
346 2). Independent shifts to bee pollination from hawkmoth pollination are perhaps not surprising  
347 considering that within sect. *Calylophus*, hawkmoth-pollinated floral forms exhibit plasticity in  
348 hypanthium length and diameter and do not prevent occasional pollination by bees (Lewis et al.  
349 in prep; Towner 1977). Hawkmoth-pollinated taxa in sect. *Calylophus* exhibit vespertine anthesis,  
350 which separates them temporally from diurnal bees, but plasticity in the timing of anthesis is also  
351 common among populations (Towner 1977), and hawkmoths are documented to vary  
352 spatiotemporally in abundance (Miller 1981; Campbell et al. 1997; Artz et al. 2010). Additionally,  
353 it has been shown that florivore-mediated selection drives floral trait shifts in sect. *Calylophus*  
354 towards bee pollinated floral forms (Jogesh et al. 2017; Bruzzese et al. 2019). Plasticity in  
355 reproductive traits that allow some continued pollination by bees provides an alternative mode of  
356 pollen transfer and may represent a mechanism for ensuring pollination. While studies have  
357 shown that pre-mating barriers such as these contribute greatly to reproductive isolation (Stanton  
358 et al. 2016), our results show that multiple, independent shifts from hawkmoth to bee  
359 pollination and associated morphological changes, such as the shorter corolla length of bee  
360 pollinated flowers, may occur in sect. *Calylophus*, and hence may not be a particularly reliable  
361 character for diagnosing taxa in this group.

362 Stochastic mapping (supplemental) suggests that there are multiple origins of permanent  
363 translocation heterozygosity (PTH) in sect. *Calylophus*. While ring chromosomes are common  
364 and found in all taxa in sect. *Calylophus*, PTH is currently known from only one taxon, *O.*  
365 *serrulata*. Because neighboring populations of *O. serrulata* and its putative progenitor *O.*  
366 *capillifolia* subsp. *berlandieri* often resemble each other phenetically, Towner (1977)



367 hypothesized that *O. serrulata* may have originated multiple times through independent origins  
368 of translocation heterozygosity in different geographic regions, and may be best recognized as “a  
369 complex assemblage of populations having a common breeding system.” However, this has  
370 never before been explored in a phylogenetic context, nor has it been clearly demonstrated with  
371 phylogenetic studies in Onagraceae. In our summary coalescent trees, all currently recognized  
372 taxa in subsect. *Calylophus* were paraphyletic and *O. serrulata* was scattered throughout the  
373 subsection (Fig. 2, S6, S7). Although support values are not always high for the positions of  
374 various populations of *O. serrulata*, there is at least one well defined, well supported split among  
375 populations of *O. serrulata*. In our summary coalescent trees, the two *O. serrulata* accessions  
376 from south Texas (MJM 970 & MJM 983) grouped with other south Texas populations of *O.*  
377 *capillifolia* subsp. *berlandieri* with generally strong support (Fig. 2, S6, S7). This relationship  
378 was supported in PCA space as well, where MJM 983 was morphologically more similar to the  
379 south Texas *O. capillifolia* subsp. *berlandieri* accessions than to other *O. serrulata* (Fig 4C). Our  
380 results are therefore consistent with an independent origin of PTH in coastal Texas populations  
381 of *O. serrulata*, demonstrating at minimum two origins of PTH (see *Taxonomic Implications*  
382 below). However we cannot rule out other independent origins of PTH, for example in the  
383 populations of *O. capillifolia* subsp. *berlandieri* occupying sand dunes in western Texas and  
384 southeastern New Mexico, or in the other taxa in subsect. *Calylophus*: *O. capillifolia* subsp.  
385 *berlandieri*, or the gypsum endemic *O. gayleana*.

386 Independent origins of gypsum endemism in sect. *Calylophus* are also supported by our  
387 analyses (supplemental). Edaphic specialization is a fundamental driver of speciation in plants  
388 and contributes greatly to endemism and species diversity in areas with geologically distinct  
389 substrates such as gypsum and serpentine outcrops (Kruckeberg 1984; Anacker et al. 2011;  
390 Cacho and Strauss 2014; Moore et al. 2014). To date, two gypsum endemic taxa have been  
391 described in sect. *Calylophus*, one in each subsection: *O. hartwegii* subsp. *filifolia*, which is  
392 relatively widespread on gypsum in New Mexico and trans-Pecos Texas and only rarely grows in  
393 sympatry with other taxa, and the recently described *O. gayleana*, which is found in southeastern  
394 New Mexico and adjacent western Texas, with disjunct populations in northern Texas and  
395 western Oklahoma (Turner and Moore 2014). Despite low support and low gene tree congruence  
396 in our analyses, the two gypsum endemic taxa had moderate sCF support (Fig. 2, S9), much like  
397 other taxa with similarly low support and high levels of discordance. In addition, while both  
398 gypsum endemics overlapped with other taxa in our morphometric analysis, they occupied  
399 morphological extremes in PCA space (Fig. 4). Given that other well-supported taxa are also not  
400 well differentiated in PCA space, it is not remarkable that the two gypsum endemic taxa were  
401 also not more differentiated from other taxa morphologically. Perhaps the strongest evidence in  
402 our data for their recognition is that we found no evidence of admixture between either of these  
403 gypsum endemic taxa and other closely related taxa (Fig. 3a, S10).

404

#### 405 *Taxonomic Implications*

406 The most consequential taxonomic result that arises from our analysis is the position of  
407 *O. toumeyi*, a member of subsect. *Salpingia*, as sister to subsect. *Calylophus* with strong support,  
408 rendering subsect. *Salpingia* paraphyletic (Fig. 2, S9). The current taxonomy groups *O. toumeyi*  
409 with *O. hartwegii* due to similar floral and bud characters including large flowers and long floral  
410 tubes suggestive of hawkmoth pollination, and rounded buds with long, free sepal-tips (Towner  
411 1977). Because the breeding system is a defining difference in the current circumscription

412 between the two subsections in sect. *Calylophus*, this result supports abandoning subsections  
413 altogether in sect. *Calylophus*.

414 Within subsect. *Salpingia* our results also suggest the need for revision. While our  
415 phylogenetic analyses strongly support the current circumscription of *O. lavandulifolia* (sensu  
416 Towner 1977) as a distinct species within subsect. *Salpingia* (Fig. 2, S9), the relationships of the  
417 other two species *O. hartwegii* and *O. tubicula* are less clear. Towner (1977) differentiated these  
418 two species by the breeding system and grouped the five subspecies of *O. hartwegii* together  
419 based on a pattern of reticulate and intergrading variation in which taxa were distinguished from  
420 one another by often slight differences in pubescence and leaf shape. Our morphometric analysis  
421 confirmed this pattern; however, our phylogenetic results indicated that one taxon, *O. hartwegii*  
422 subsp. *fendleri*, shares a closer relationship with the bee pollinated *O. tubicula* subsp. *tubicula*  
423 than other taxa in the hawkmoth pollinated *O. hartwegii* species complex (Fig. 2, S6, S7). This  
424 relationship was strongly supported and renders *O. hartwegii*, according to the current  
425 circumscription, paraphyletic (Towner 1977). Based on strong phylogenetic support for this  
426 clade, and its strong morphological distinctiveness as described by Towner (1977), we suggest  
427 that *O. hartwegii* subsp. *fendleri* be elevated to the species level along with both races of *O.*  
428 *tubicula* which were equally well supported in phylogenetic analysis and are geographically  
429 isolated. Furthermore, our results support a specific distinction for *O. hartwegii* subsp. *filifolia*.  
430 While this taxon was poorly supported in our summary coalescent trees (Fig. 2, S6, S7), we  
431 found no evidence of hybridization between this taxon and other closely related taxa. In addition,  
432 *O. hartwegii* subsp. *fillifolia* is restricted to gypsum. Therefore, we believe that the ecological  
433 distinctiveness and lack of gene flow of *O. hartwegii* subsp. *filifolia* with other taxa in the *O.*  
434 *hartwegii* species complex warrants its elevation as a distinct species. In light of these changes,  
435 and to maintain consistency in classification in the subsection, we feel that despite the evidence  
436 of hybridization of *O. hartwegii* subsp. *pubescens* with *O. hartwegii* subsp. *hartwegii*, it  
437 possesses a morphological distinctiveness that is supported by our phylogenetic results. We  
438 therefore recommend this taxon be elevated to the species level, while *O. hartwegii* subsp.  
439 *hartwegii* and *O. hartwegii* subsp. *maccartii* be retained as is, forming a polytypic species with  
440 two subspecies.

441 In contrast to the relatively clear divisions among taxa in subsect. *Salpingia* in our  
442 coalescent trees, none of the four currently recognized taxa in the subsect. *Calylophus* were  
443 consistently recovered as monophyletic. For example, *O. capillifolia* subsp. *capillifolia* was  
444 monophyletic in our exon-only summary coalescent tree, but not in the “supercontig” tree, and  
445 *O. capillifolia* subsp. *berlandieri* and *O. serrulata* were scattered throughout sect. *Calylophus* in  
446 both trees, perhaps suggesting widespread gene flow and/or multiple origins of PTH (Fig. 2, S6).  
447 Importantly, our results suggest that the circumscription of *O. gayleana* sensu Turner and Moore  
448 (2014) should be amended. Specifically, we find that the populations of subsect. *Calylophus*  
449 from northern Texas and western Oklahoma that were assigned to *O. gayleana* by Turner and  
450 Moore (2014; MJM790-5, BJC71) instead may belong to *O. serrulata* based on both their  
451 phylogenetic positions (Fig. 2, S6, S7) and reduced pollen fertility (S12). These north  
452 Texas/western Oklahoma populations seem to represent slightly narrower-leaved individuals of  
453 *O. serrulata*, which is a common inhabitant of the extensive gypsum outcrops of this area  
454 (although it is not restricted to gypsum there).

455 Finally, our results highlight an unrecognized cryptic taxon within *O. capillifolia* formed  
456 by southern Texas coastal populations currently recognized as *O. capillifolia* subsp. *berlandieri*.  
457 Towner (1977) described *O. capillifolia* as a polytypic species with two well-differentiated

458 morphological races. Though he noted the geographic and cytological distinction of the southern  
459 Texas coastal populations of *O. capillifolia* subsp. *berlandieri*, these populations were included  
460 in *O. capillifolia* subsp. *berlandieri* primarily because of, “completely overlapping  
461 morphological variation.” In our results, this cryptic clade of southern Texas coastal populations  
462 of *O. capillifolia* subsp. *berlandieri* is the most phylogenetically well supported clade in subsect.  
463 *Calylophus* and therefore may warrant taxonomic distinction based on our data (Fig. 2, S9r).  
464 Similarly, the southern Texas coastal populations of *O. serrulata*, which is likely an independent  
465 origin of PTH derived from this cryptic southern Texas coastal clade of *O. capillifolia* subsp.  
466 *berlandieri*, are ecologically distinctive and geographically disjunct from other *O. serrulata*  
467 (occurring in coastal dunes, unlike other populations in western Texas, Oklahoma, and northern  
468 Texas). In the past they were considered distinctive enough to be described as a species,  
469 *Calylophus australis* (Towner & Raven 1970). However, Towner (1977) later sunk this variation  
470 into *O. serrulata* based on his decision to treat all PTH populations as *O. serrulata*. Combined  
471 with our results here and the ecogeographic distinctiveness consistent with an independent origin  
472 of PTH in coastal Texas, we believe this taxon also warrants recognition as a second PTH  
473 species in *Oenothera* sect. *Calylophus*.

474

## 475 CONCLUSIONS

476

477 Here we describe a robust example of resolving a recent, rapid radiation using multiple  
478 sources of evidence: (1) extensive sampling from populations throughout the geographic and  
479 morphological range, (2) target enrichment for hundreds of nuclear genes, (3) the inclusion of  
480 flanking non-coding regions, (4) gene tree-based hybridization inference, (5) SNPs extracted  
481 from target enrichment data, and (6) morphometrics. Our results indicate that in recently radiated  
482 species complexes with low sequence divergence and/or high levels of ILS that could be an  
483 intractable problem with traditional loci, the use of targeted enrichment in addition to flanking  
484 non-coding regions provides a net benefit and is essential to recover species-level resolution. Our  
485 results also underscore the importance of summary coalescent methods and evaluating gene tree  
486 discordance for resolving historical relationships in recalcitrant groups. By explicitly testing for  
487 hybridization using gene tree approaches, we also demonstrate that the estimated number of  
488 character state transitions may be artifactually inflated if hybridization is not taken into account.  
489 This, in combination with morphometrics, provided key evolutionary insights where  
490 relationships in summary coalescent methods may be obscured by gene flow. Importantly, our  
491 study uncovers strong evidence for multiple origins of biologically important phenomena,  
492 including PTH, the evolution of bee pollination, and the evolution of edaphic specialization.  
493 Consequently, *Oenothera* sect. *Calylophus* might represent a powerful system for understanding  
494 these phenomena, especially with future genome sequence data.

495

## 496 FUNDING SOURCES

497

498 This work was supported by National Science Foundation grants DEB-1342873 to KAS, JAF,  
499 and NJW, and DEB-1054539 to MJM. Additional support was provided by the National  
500 Geographic Society, Oberlin College, The Chicago botanic Garden, The Shaw Fellowship, New  
501 Mexico Native Plant Society, American Society of Plant Taxonomists, and The Society of  
502 Herbarium Curators.

503

504 REFERENCES

505

506 Alexander M.P. 1969. Differential Staining of Aborted and Nonaborted Pollen. *Stain Technol.*  
507 44:117–122.

508 Alexander M.P. 1980. A Versatile Stain for Pollen Fungi, Yeast and Bacteria. *Stain Technol.*  
509 55:13–18.

510 Anacker B.L., Whittall J.B., Goldberg E.E., Harrison S.P. 2011. Origins and consequences of  
511 serpentine endemism in the California flora. *Evolution (N. Y.)*. 65:365–376.

512 Artz D.R., Villagra C. A., Raguso R. A. 2010. Spatiotemporal variation in the reproductive  
513 ecology of two parapatric subspecies of *Oenothera cespitosa* (Onagraceae). *Am. J. Bot.*  
514 97:1498–510.

515 Barrett S., Harder L., Worley A. 1996. The comparative biology of pollination and mating in  
516 flowering plants. *Philos. Trans. R. Soc. B Biol. Sci.* 351:1271–1280.

517 Barrett S.C.H. 2013. The evolution of plant reproductive systems: how often are transitions  
518 irreversible? *Proc R Soc B.* 280:20130913.

519 Blischak P.D., Chifman J., Wolfe A.D., Kubatko L.S. 2018. HyDe: A python package for  
520 genome-scale hybridization detection. *Syst. Biol.* 67:821–829.

521 Boberg E., Alexandersson R., Jonsson M., Maad J., Ågren J., Nilsson L.A. 2014. Pollinator  
522 shifts and the evolution of spur length in the moth-pollinated orchid *Platanthera bifolia*.  
523 *Ann. Bot.* 113:267–275.

524 Bolger A.M., Lohse M., Usadel B. 2014. Trimmomatic: A flexible trimmer for Illumina  
525 sequence data. *Bioinformatics.* 30:2114–2120.

526 Brady K.U., Kruckeberg A.R., Bradshaw H.D. 2005. Evolutionary ecology of plant adaptation to  
527 serpentine soils. *Annu. Rev. Ecol. Evol. Syst.* 36:243–266.

528 Bruzese D.J., Wagner D.L., Harrison T., Jogesh T., Overson R.P., Wickett N.J., Raguso R.A.,  
529 Skogen K.A. 2019. Phylogeny, host use, and diversification in the moth family Momphidae  
530 (Lepidoptera: Gelechioidea). *PLoS One.* 14:e0207833.

531 Bryson R.W., Linkem C.W., Dorcas M.E., Lathrop A., Jones J.M., Alvarado-Díaz J., Grünwald  
532 C.I., Murphy R.W. 2014. Multilocus species delimitation in the *Crotalus triseriatus* species  
533 group (serpentes: Viperidae: Crotalinae), with the description of two new species. *Zootaxa.*  
534 3826:475–496.

535 Cacho N.I., Strauss S.Y. 2014. Occupation of bare habitats, an evolutionary precursor to soil  
536 specialization in plants. *Proc. Natl. Acad. Sci.* 111:15132–15137.

537 Campbell D.R., Waser N.M., Melendez-Ackerman E.J.. 1997. Analyzing pollinator-mediated  
538 selection in a plant hybrid zone: Hummingbird visitation patterns on three spatial scales.  
539 *Am. Nat.* 149:295–315.

540 Chifman J., Kubatko L. 2014. Quartet inference from SNP data under the coalescent model.  
541 *Bioinformatics.* 30:3317–3324.

542 Chifman J., Kubatko L. 2015. Identifiability of the unrooted species tree topology under the  
543 coalescent model with time-reversible substitution processes, site-specific rate variation,  
544 and invariable sites. *J. Theor. Biol.* 374:35–47.

545 Christie M.R., Knowles L.L. 2015. Habitat corridors facilitate genetic resilience irrespective of  
546 species dispersal abilities or population sizes. *Evol. Appl.* 8:454–463.

547 Crepet W.L., Niklas K.J. 2009. Darwin’s second “abominable mystery”: Why are there so many  
548 angiosperm species? *Am. J. Bot.* 96:366–81.

549 Duarte J.M., Wall P.K., Edger P.P., Landherr L.L., Ma H., Pires J.C., Leebens-Mack J.,

- 550 dePamphilis C.W. 2010. Identification of shared single copy nuclear genes in *Arabidopsis*,  
551 *Populus*, *Vitis* and *Oryza* and their phylogenetic utility across various taxonomic levels.  
552 BMC Evol Biol. 10:61.
- 553 Eckert A.J., Carstens B.C. 2008. Does gene flow destroy phylogenetic signal? The performance  
554 of three methods for estimating species phylogenies in the presence of gene flow. Mol.  
555 Phylogenet. Evol. 49:832–842.
- 556 Ehrlich, P. R., & Raven, P. H. (1969). Differentiation of populations. Science. 165:1228–1232.
- 557 Folk R.A., Mandel J.R., Freudenstein J. V. 2015. A protocol for targeted enrichment of intron-  
558 containing sequence markers for recent radiations: A phylogenomic example from  
559 *Heuchera* (Saxifragaceae). Appl. Plant Sci. 3:1500039.
- 560 Fricot E, Mathieu F, Trouillon T, Bouchard G and Fran,cois O (2014) Fast and efficient  
561 estimation of individual ancestry coefficients. Genetics. 196:973-983.
- 562 Gerard D., Gibbs H.L., Kubatko L. 2011. Estimating hybridization in the presence of  
563 coalescence using phylogenetic intraspecific sampling. BMC Evol. Biol. 11:291.
- 564 Giarla T.C., Esselstyn J.A. 2015. The challenges of resolving a rapid, recent radiation: Empirical  
565 and simulated phylogenomic of Philippine shrews. Syst. Biol. 64(5):727-740.
- 566 Green R., Krause J., Briggs A., Rasilla Vives M., Fortea Pérez F. 2010. A draft sequence of the  
567 neandertal genome. Science. 328:710–722.
- 568 Heyduk K., Trapnell D.W., Barrett C.F., Leebens-mack J.I.M. 2016. Phylogenomic analyses of  
569 species relationships in the genus *Sabal* (Arecaceae) using targeted sequence capture. Biol.  
570 J. Linn. Soc. 117(1):106-120.
- 571 Jogesh T., Overson R.P., Raguso R.A., Skogen K.A. 2017. Herbivory as an important selective  
572 force in the evolution of floral traits and pollinator shifts. AoB Plants. 9(1):plw088.
- 573 Johnson M.G., Gardner E.M., Liu Y., Medina R., Goffinet B., Shaw A.J., Zerega N.J.C., Wickett  
574 N.J. 2016. HybPiper: Extracting coding sequence and introns for phylogenetics from high-  
575 throughput sequencing reads using target enrichment. Appl. Plant Sci. 4:1600016.
- 576 Johnson M.T.J., Smith S.D., Rausher M.D. 2009. Plant sex and the evolution of plant defenses  
577 against herbivores. Proc. Natl. Acad. Sci. 106:18079–18084.
- 578 Jombart, T. (2008) adegenet: a R package for the multivariate analysis of genetic markers.  
579 Bioinformatics 24:1403-1405.
- 580 Jombart T, Devillard S and Balloux, F (2010). Discriminant analysis of principal components: a  
581 new method for the analysis of genetically structured populations. BMC Genetics. 11:94.
- 582 Katinas L., Crisci J., Wagner W., Hoch P. 2004. Geographical diversification of tribes  
583 Epilobieae, Gongylocarpeae, and Onagreae (Onagraceae) in North America, based on  
584 parsimony analysis of endemism and track compatibility analysis. Ann. Missouri Bot.  
585 91:159–185.
- 586 Knowles L.L. 2009. Estimating species trees: Methods of phylogenetic analysis when there is  
587 incongruence across genes. Syst. Biol. 58:463–467.
- 588 Knowles L.L., Chan Y.-H. 2008. Resolving species phylogenies of recent evolutionary  
589 radiations. Ann. Missouri Bot. Gard. 95:224–231.
- 590 Kruckeberg A. 1984. California Serpentine: Flora, Vegetation, Geology, Soils, and  
591 Management Problems. Berkeley: Univ of California Press.
- 592 Kubatko L.S., Chifman J. 2019. An invariants-based method for efficient identification of hybrid  
593 species from large-scale genomic data. BMC Evol. Biol. 19:1–13.
- 594 Leaché A.D., Harris R.B., Rannala B., Yang Z. 2014. The influence of gene flow on species tree  
595 estimation: a simulation study. Syst. Biol. 63:17–30.

- 596 Lemmon A.R., Emme S.A., Lemmon E.M. 2012. Anchored hybrid enrichment for massively  
597 high-throughput phylogenomics. *Syst. Biol.* 61:727–744.
- 598 Levin R., Wagner W., Hoch P. 2004. Paraphyly in Tribe Onagreae : Insights into Phylogenetic  
599 Relationships of Onagraceae Based on Nuclear and Chloroplast Sequence Data. *Syst. Bot.*  
600 29:147–164.
- 601 Maddison W.P., Knowles L. 2006. Inferring Phylogeny Despite Incomplete Lineage Sorting.  
602 *Evol. Biol.* 55:21–30.
- 603 Mamanova L., Coffey A.J., Scott C.E., Kozarewa I., Turner E.H., Kumar A., Howard E.,  
604 Shendure J., Turner D.J. 2010. Target-enrichment strategies for next- generation  
605 sequencing. *Nat. Methods.* 7:111–118.
- 606 Mandel J.R., Dikow R.B., Funk V. a, Masalia R.R., Staton S.E., Kozik A., Michelmore R.W.,  
607 Rieseberg L.H., Burke J.M. 2014. A target enrichment method for gathering phylogenetic  
608 information from hundreds of loci: An example from the Compositae. *Appl. Plant Sci.* 2:1–  
609 6.
- 610 Meng C., Kubatko L.S. 2009. Detecting hybrid speciation in the presence of incomplete lineage  
611 sorting using gene tree incongruence: A model. *Theor. Popul. Biol.* 75:35–45.
- 612 Miller R.B.. 1981. Hawkmoths and the Geographic Patterns of Floral Variation in *Aquilegia*  
613 *caerulea*. *Evolution* (N. Y). 35:763–774.
- 614 Minh B.Q., Hahn M.W., Lanfear R. 2020. New methods to calculate concordance factors for  
615 phylogenomic datasets. *Mol. Biol. Evol.* 37(9):2727-2733.
- 616 Mirarab S., Warnow T. 2015. ASTRAL-II: Coalescent-based species tree estimation with many  
617 hundreds of taxa and thousands of genes. *Bioinformatics.* 31:i44–i52.
- 618 Moore M., Jansen R. 2007. Origins and biogeography of gypsophily in the Chihuahuan Desert  
619 plant group *Tiquilia* Subg. subg. *Eddya*. *Syst. Bot.* 32:392–414.
- 620 Moore M.J., Mota J.F., Douglas N.A., Flores Olvera H., Ochoterena H. 2014. Ecology assembly  
621 evolution gypsophile floras. In: Rajakaruna N., Boyd R.S., Harris T.B., editors. *Plant*  
622 *Ecology and Evolution in Harsh Environments*. New York: Nova Science Publishers, Inc. p.  
623 97–128.
- 624 Nason J.D., Hamrick J.L., Fleming T.H. 2002. Historical vicariance and postglacial colonization  
625 effects on the evolution of genetic structure in *Lophocereus*, a Sonoran Desert columnar  
626 cactus. *Evolution* 56:2214–2226.
- 627 Van der Niet T., Johnson S.D. 2012. Phylogenetic evidence for pollinator-driven diversification  
628 of angiosperms. *Trends Ecol. Evol.* 27:353–361.
- 629 van der Niet T., Johnson S.D., Linder H.P. 2006. Macroevolutionary data suggest a role for  
630 reinforcement in pollination system shifts. *Evolution* 60:1596–1601.
- 631 Van Der Niet T., Peakall R., Johnson S.D. 2014. Pollinator-driven ecological speciation in  
632 plants: New evidence and future perspectives. *Ann. Bot.* 113:199–211.
- 633 Peakall R., Ebert D., Poldy J., Barrow R.A., Francke W., Bower C.C., Schiestl F.P. 2010.  
634 Pollinator specificity, floral odour chemistry and the phylogeny of Australian sexually  
635 deceptive *Chiloglottis* orchids: implications for pollinator-driven speciation. *New Phytol.*  
636 188:437–50.
- 637 Rajakaruna N. 2004. The Edaphic Factor in the Origin of Plant Species. *Int. Geol. Rev.* 46:471–  
638 478.
- 639 Raven P.H. 1964. Catastrophic Selection and Edaphic Endemism. *Evolution* 18:336–338.
- 640 Raven P.H. 1979. A survey of reproductive biology in Onagraceae. *New Zeal. J. Bot.* 17:575–  
641 593.

- 642 R Core Team. 2020. R: A language and environment for statistical computing. R Foundation for  
643 Statistical Computing, Vienna, Austria.
- 644 Roch S., Steel M. 2015. Likelihood-based tree reconstruction on a concatenation of aligned  
645 sequence data sets can be statistically inconsistent. *Theor. Popul. Biol.* 100:56–62.
- 646 Sayyari E., Mirarab S. 2016. Fast coalescent-based computation of local branch support from  
647 quartet frequencies. *Mol. Biol. Evol.* 33(7):1654–68.
- 648 Schliep K.P. 2011. phangorn: phylogenetic analysis in R. *Bioinformatics.* 27(4):592–593.
- 649 Skogen K.A., Overson R.P., Hilpman E.T., Fant J.B. 2019. Hawkmoth pollination facilitates  
650 long-distance pollen dispersal and reduces isolation across a gradient of land-use change.  
651 *Ann. Missouri Bot. Gard.* 104:495–511.
- 652 Smith S.A., Moore M.J., Brown J.W., Yang Y. 2015. Analysis of phylogenomic datasets reveals  
653 conflict, concordance, and gene duplications with examples from animals and plants. *BMC*  
654 *Evol. Biol.* 15:150.
- 655 Stamatakis A. 2014. Stamatakis - 2014 - RAxML version 8 a tool for phylogenetic analysis and  
656 post-analysis of large phylogenies. 2010–2011.
- 657 Stanton K., Valentin C.M., Wijnen M.E., Stutzman S., Palacios J.J., Cooley A.M. 2016.  
658 Absence of postmating barriers between a selfing vs. Outcrossing chilean *Mimulus* species  
659 pair. *Am. J. Bot.* 103:1030–1040.
- 660 Stebbins G.L. 1970. Adaptive Radiation of Reproductive Characteristics in Angiosperms, I:  
661 Pollination Mechanisms. *Annu. Rev. Ecol. Syst.* 1:307–326.
- 662 Stephens J.D., Rogers W.L., Heyduk K., Cruse-Sanders J.M., Determann R.O., Glenn T.C.,  
663 Malmberg R.L. 2015. Resolving phylogenetic relationships of the recently radiated  
664 carnivorous plant genus *Sarracenia* using target enrichment. *Mol. Phylogenet. Evol.* 85:76–  
665 87.
- 666 Stockhouse R.E.I. 1973. Biosystematic Studies of *Oenothera* L. Subgenus *Pachylophus*. Univ.  
667 Microfilm. Ph.D. thesis. Colorado State University.
- 668 Straub S.C.K., Parks M., Weitemier K., Fishbein M., Cronn R.C., Liston A. 2012. Navigating the  
669 tip of the genomic iceberg: Next-generation sequencing for plant systematics. *Am. J. Bot.*  
670 99:349–64.
- 671 Swofford, D. L. 2003. PAUP\*. Phylogenetic Analysis Using Parsimony (\*and Other Methods).  
672 Version 4. Sinauer Associates, Sunderland, Massachusetts.
- 673 Thomson J.D., Wilson P. 2008. Explaining Evolutionary Shifts between Bee and Hummingbird  
674 Pollination: Convergence, Divergence, and Directionality. *Int. J. Plant Sci.* 169:23–38.
- 675 Towner H.F., Raven P.H. 1970. A new species and some new combinations in *Calylophus*  
676 (*Onagraceae*). *Madrono.* 20: 241–245.
- 677 Towner H.F. 1977. The Biosystematics of *Calylophus* (*Onagraceae*). *Ann. Missouri Bot. Gard.*  
678 64:48–120.
- 679 Tripp E.A., Manos P.S. 2008. Is floral specialization an evolutionary dead-end? Pollination  
680 system transitions in *Ruellia* (*Acanthaceae*). *Evolution* 62:1712–1737.
- 681 Turner B.L., Moore M.J. 2014. *Oenothera gayleana* (*Oenothera* sect. *Calylophus*, *Onagraceae*),  
682 a new gypsophile from Texas, New Mexico, and Oklahoma. *Phytologia.org.* 96:200–206.
- 683 Wagner W., Hoch P., Raven P. 2007. Revised Classification of the *Onagraceae*. *Syst. Bot.*  
684 *Monogr.* 83:1–240.
- 685 Wagner W.L. In press. *Oenothera*. In: *Flora of North America* Editorial Committee, editor. *Flora*  
686 *of North America North of Mexico*. New York and Oxford. Vol. 10.
- 687 Weitemier K., Straub S.C.K., Cronn R.C., Fishbein M., Schmickl R., McDonnell A., Liston A.

- 688           2014. Hyb-Seq: Combining Target Enrichment and Genome Skimming for Plant  
689           Phylogenomics. *Appl. Plant Sci.* 2:1400042.
- 690   Wilson P., Wolfe A.D., Armbruster W.S., Thomson J.D. 2007. Constrained lability in floral  
691           evolution: Counting convergent origins of hummingbird pollination in *Penstemon* and  
692           *Keckiella*. *New Phytol.* 176:883–890.
- 693   Xi Z., Liu L., Rest J.S., Davis C.C. 2014. Coalescent versus Concatenation Methods and the  
694           Placement of *Amborella* as Sister to Water Lilies. *Syst. Biol.* 63:919–932.
- 695   Xu S., Schlüter P.M., Scopece G., Breitkopf H., Gross K., Cozzolino S., Schiestl F.P. 2011.  
696           Floral isolation is the main reproductive barrier among closely related sexually deceptive  
697           orchids. *Evolution.* 65:2606–20.



698 FIGURES  
699

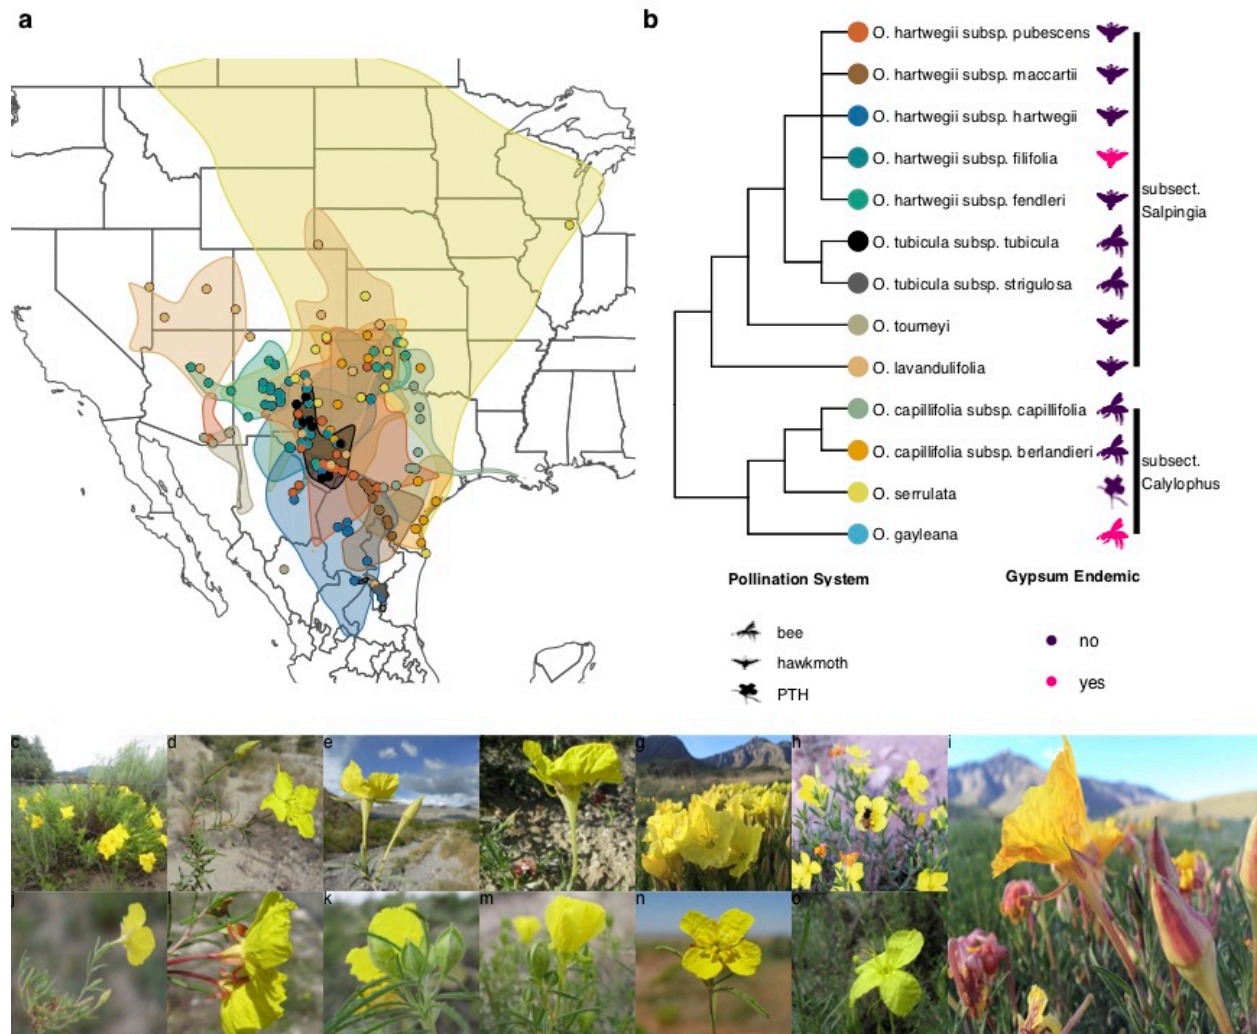

700  
701  
702  
703  
704  
705  
706  
707  
708  
709  
710  
711  
712  
713  
714  
715

Figure 1. (a) Range map of all taxa in *Oenothera* sect. *Calylophus* (based on Towner 1977). Sampling locations of leaf tissue samples (points; color corresponds to taxa in cladogram to the right [Figure 1b]) and estimated taxon ranges (polygons; colors correspond to Figure 1b) proposed by Towner (1977) and Turner and Moore (2014). (b) Estimated cladogram of *Oenothera* sect. *Calylophus* sensu Towner (1977) and Turner and Moore (2014). Symbols to the right of tip labels signify pollination system (bee, hawkmoth, or Permanent Translocation Heterozygosity [PTH]) and the symbol color specifies whether a given taxon is a gypsum endemic (purple = no, pink = yes). Photo panels: (c) *Oenothera hartwegii* subsp. *fendleri* (d) *Oenothera hartwegii* subsp. *filifolia* (e) *Oenothera hartwegii* subsp. *hartwegii* (f) *Oenothera hartwegii* subsp. *maccartii* (g) *Oenothera hartwegii* subsp. *pubescens* (h) *Oenothera tubicula* subsp. *tubicula* (i) *Oenothera lavandulifolia* (j) *Oenothera tubicula* subsp. *strigulosa* (k) *Oenothera capillifolia* subsp. *berlandieri* (l) *Oenothera capillifolia* subsp. *capillifolia* (m) *Oenothera gayleana* (n) *Oenothera serrulata* (o) *Oenothera toumeyi*

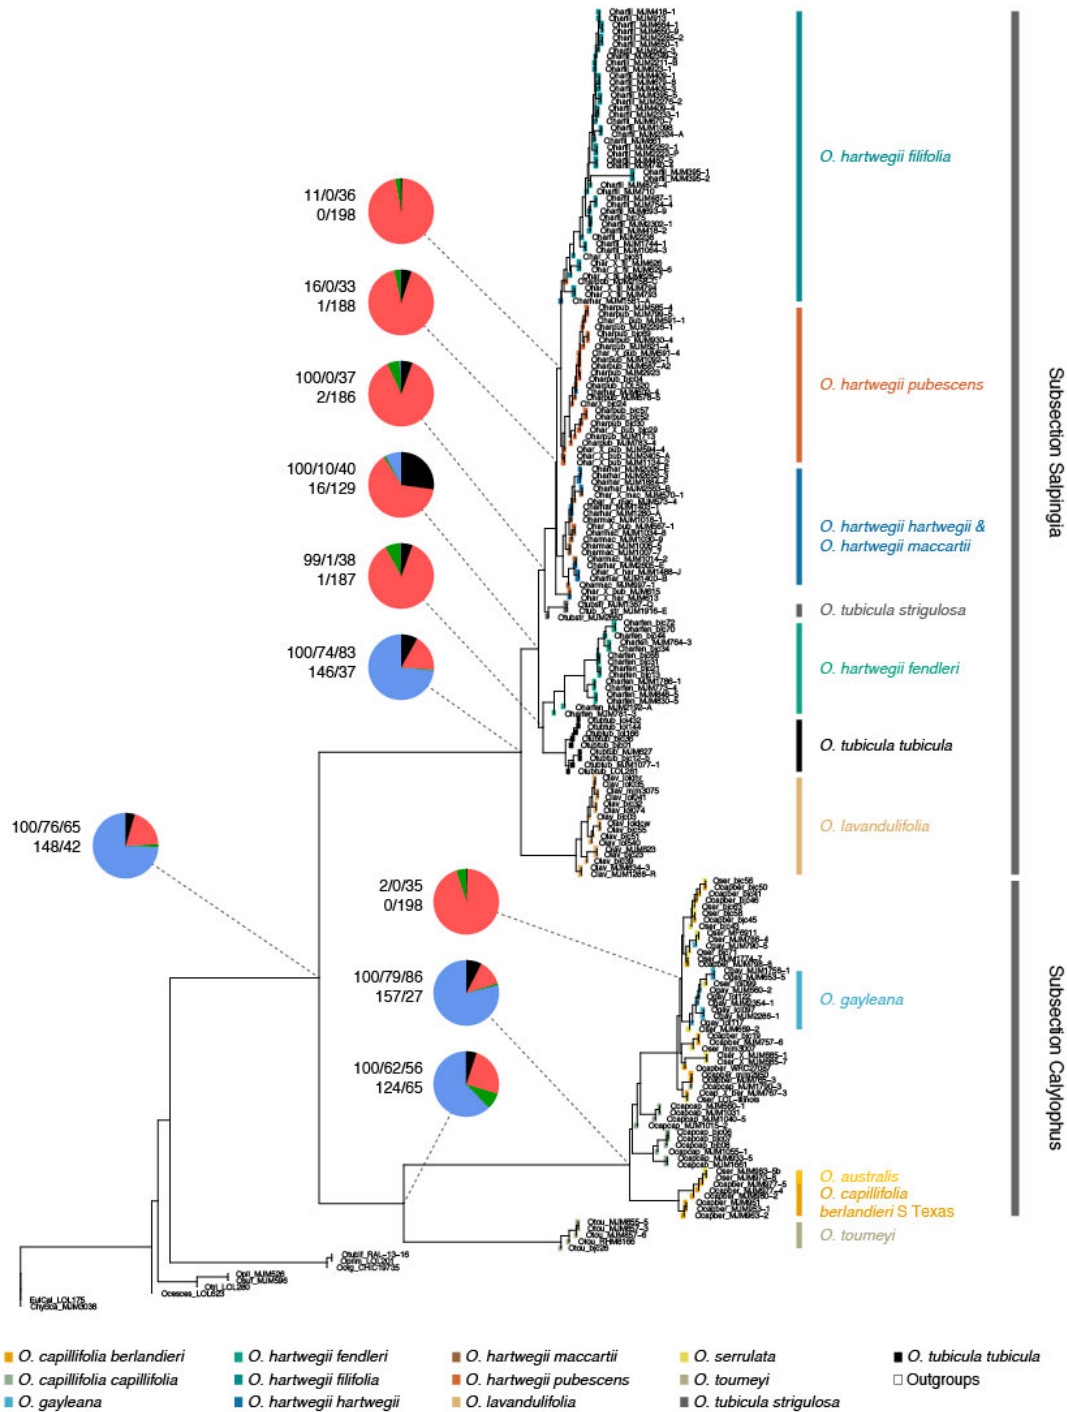

716  
717

718 Figure 2. ASTRAL-II summary coalescent tree constructed using the “Supercontig” dataset with  
719 100 bootstraps. At relevant nodes, piecharts represent Phyparts analysis (blue = concordant,  
720 green = most conflict, red = all other conflict, black = uninformative gene trees), top row of  
721 support values are bootstrap values from ASTRAL-II, and gCF and sCF from IQTree  
722 (BS/gCF/sCF), bottom two support values are number of concordant gene trees for the node and  
723 total number of gene trees minus the number of concordant gene trees at that node  
724 (concord/discord). Colored tip points correspond to taxon designation.

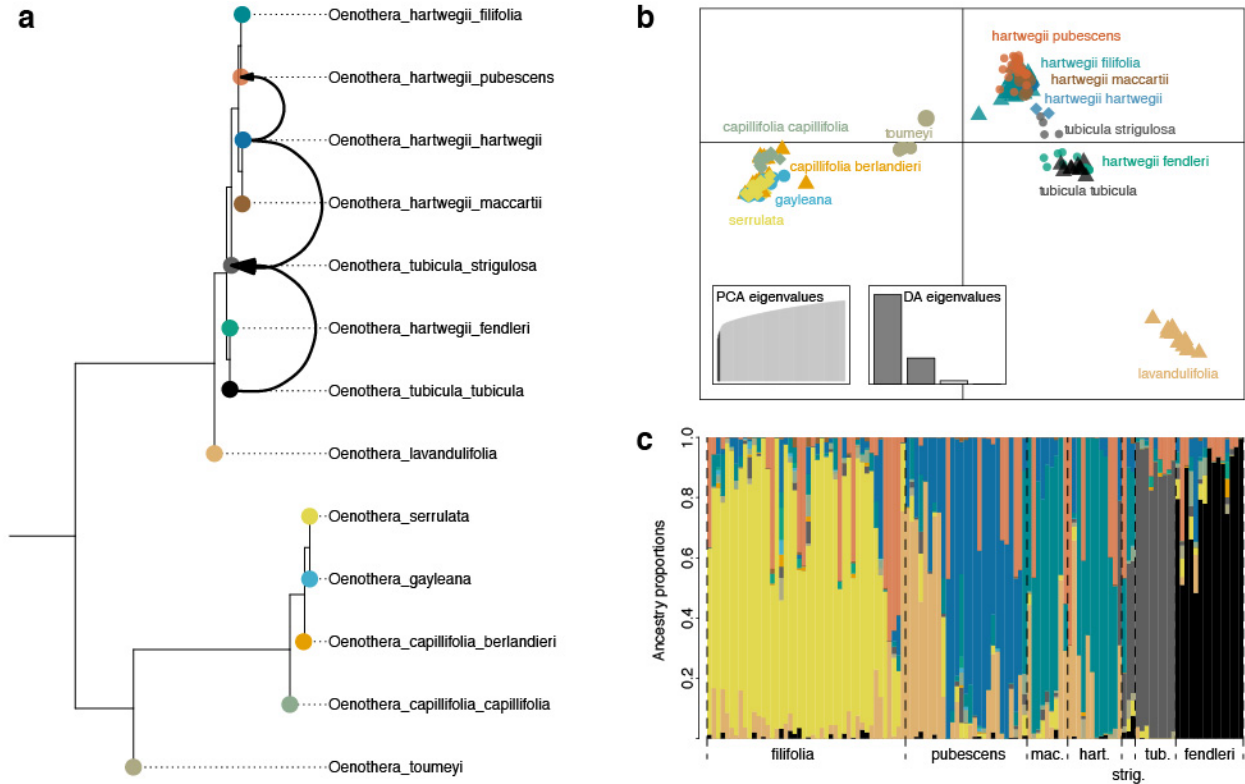

725  
 726

727 Figure 3. (a) Summary of HyDe Analysis annotated on ASTRAL-III species tree constructed  
 728 using the “Supercontig” dataset; black arrows represent direction of admixture detected by HyDe  
 729 analysis. (b) Discriminant Analysis of Principal Components based on a filtered set of SNPs  
 730 extracted from the entire supercontig dataset, and (c) sNMF plot of inferred ancestry coefficients  
 731 using the same set of filtered SNPs but limited to subsection *Salpingia*.

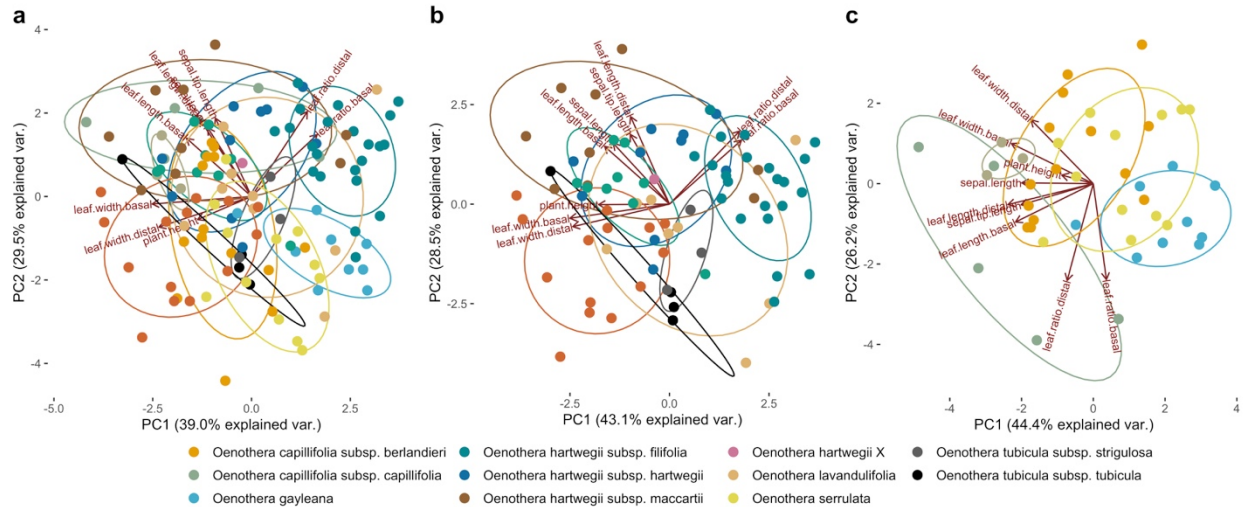

Figure 4. Morphometric Principal Components Analysis (PCA) using 9 morphological characters (plant height, leaf length [basal and distal], leaf width [basal and distal], leaf length/width ratio (basal and distal), and sepal tip length) for (a) Section *Calylophus* (b) Subsection *Salpingia* without *O. toumeyi*, and (c) Subsection *Calylohus* with *O. toumeyi* included.

738 SUPPLEMENTAL MATERIAL

739 **S1**

740 See excel table “S1 Accessions and Seq Stats”

741 **S2**

742 Number of leaf tissue accessions sequenced from each taxon

| Taxon                                              | No. of Accessions | 743 |
|----------------------------------------------------|-------------------|-----|
| <i>O. lavandulifolia</i>                           | 16                | 744 |
| <i>O. tubicula</i> subsp. <i>strigulosa</i>        | 3                 | 745 |
| <i>O. tubicula</i> subsp. <i>tubicula</i>          | 9                 | 746 |
| <i>O. hartwegii</i> subsp. <i>fendleri</i>         | 15                | 747 |
| <i>O. hartwegii</i> subsp. <i>filifolia</i>        | 44                | 748 |
| <i>O. hartwegii</i> subsp. <i>hartwegii</i>        | 12                | 749 |
| <i>O. hartwegii</i> subsp. <i>maccartii</i>        | 9                 | 750 |
| <i>O. hartwegii</i> subsp. <i>pubescens</i>        | 26                | 751 |
| <i>O. hartwegii</i>                                | 1                 | 752 |
| <i>O. toumeyi</i>                                  | 5                 | 753 |
| <i>O. capillifolia</i> subsp. <i>berlandieri</i>   | 17                | 754 |
| <i>O. capillifolia</i> subsp. <i>capillifolia</i>  | 11                | 755 |
| <i>O. gayleana</i>                                 | 9                 | 756 |
| <i>O. serrulata</i>                                | 17                | 757 |
| Outgroups:                                         |                   | 758 |
| <i>O. pilosella</i>                                | 1                 | 759 |
| <i>O. organensis</i>                               | 1                 | 760 |
| <i>O. primiveris</i>                               | 1                 | 761 |
| <i>O. tubifera</i>                                 | 1                 | 762 |
| <i>O. triloba</i>                                  | 1                 | 763 |
| <i>O. cespitosa</i> subsp. <i>cespitosa</i>        | 1                 | 764 |
| <i>O. suffrutescens</i>                            | 1                 | 765 |
| <i>Chylismia scapoidea</i> subsp. <i>scapoidea</i> | 1                 | 766 |
| <i>Eulobus californicus</i>                        | 1                 | 766 |
| Total                                              | 203               | 767 |
|                                                    |                   | 768 |

769 **S3**

770 SUPPLEMENTAL MATERIALS AND METHODS

771

772 *Taxon Sampling, DNA Extraction, and Determination of PTH*

773 A total of 194 individuals spanning the geographic, morphological, and ecological ranges  
774 of all 13 recognized taxa in *Oenothera* sect. *Calylophus* [following Towner (1977) and Turner  
775 and Moore (2014)] were included in this study (Fig. 1a, S1, S2) along with eight outgroups  
776 representing other major sections of *Oenothera* (*Eremia*, *Gaura*, *Kneiffia*, *Lavauxia*, *Oenothera*,  
777 *Pachylophus*, and *Ravenia*) and other genera (*Chylismia* and *Eulobus*) in Onagraceae (S1, S2).  
778 All leaf tissue samples were collected from individuals in the field between 2007 and 2015 and  
779 voucher specimens were deposited at the United States National Herbarium (US), with

780 duplicates in most cases at either the Nancy Rich Poole Herbarium (CHIC) or the George T.  
781 Jones Herbarium at Oberlin College (OC; S1). DNA was extracted from fresh, silica-dried leaf  
782 tissue using either (1) a modified CTAB protocol (Doyle 1987), (2) the Nucleon PhytoPure DNA  
783 extraction kit (GE Healthcare Life Sciences, Pittsburgh, Pennsylvania, USA), or (3) a modified  
784 CTAB and silicon dioxide purification protocol (Doyle 1987; Sharma and Purohit 2012; See S13  
785 for detail) followed by passing any extractions retaining a brown or yellow coloration through a  
786 Qiagen Qiaquick PCR spin column for additional purification according to the manufacturer's  
787 protocol (Qiagen, Venlo, Netherlands). The third DNA extraction method was used for difficult  
788 to extract, polysaccharide-rich leaf tissue samples that yielded goeey, discolored DNA following  
789 initial extraction. PTH status was determined for individuals in subsect. *Calylophus* using floral  
790 morphology and/or when flowers were present by assessing pollen fertility using a modified  
791 Alexander stain, as PTH taxa have a demonstrated 50% reduction in pollen fertility (Towner  
792 1977). For accessions identified as either *O. capillifolia* subsp. *berlandieri* or *O. serrulata* that  
793 had sufficient pollen available, pollen was removed from flowers and stained using a modified  
794 Alexander stain (Alexander 1969, 1980). Accessions with less than 50% viable pollen were  
795 assigned to *O. serrulata*, the only currently recognized PTH taxon in subsect. *Calylophus*. Pollen  
796 count data are provided in Supplement 12 (See S12 for details).

797

#### 798 *Bait Design, Library Construction, Target Enrichment, and Sequencing*

799 We targeted 322 orthologous, low-copy nuclear loci determined by clustering  
800 transcriptomes of *Oenothera serrulata* (1KP accession SJAN) and *Oenothera berlandieri* (1KP  
801 accession EQYT) to select a subset of the 956 phylogenetically informative *Arabidopsis* loci  
802 identified by Duarte et al. (2010). Transcriptomes of two *Oenothera* species, *O. serrulata* and *O.*  
803 *berlandieri*, were assembled and optimal isoforms were filtered for the longest reading frame.  
804 Assembled transcripts were aligned as amino acids to the 956 TAIR loci of *Arabidopsis* in  
805 TranslatorX (Abascal et al. 2010). This alignment identified 956 orthologous sequences, from  
806 which 322 loci were randomly selected. BLAST searches of amino acid sequences from these  
807 loci were carried out to ensure orthology between the transcript loci and the *Arabidopsis* TAIR  
808 locus. The bait set was designed from these 322 loci, which were selected from both *O. serrulata*  
809 and *O. berlandieri* sequences. A set of 19,994 120-bp baits tiled across each locus with a 60 base  
810 overlap (2x tiling) was manufactured by Arbor Biosciences (formerly MYcroarray, Ann Arbor,  
811 Michigan, USA). Sequencing libraries for 67 samples were prepared with the Illumina TruSeq  
812 Nano HT DNA Library Preparation Kit (San Diego, California, USA) following the  
813 manufacturer's protocol, except using half volumes beginning with the second addition of  
814 Dynabeads MyOne Streptavidin C1 magnetic beads (Invitrogen, Carlsbad, CA, USA). DNA  
815 samples were sheared using a Covaris M220 Focused-Ultrasonicator (Covaris, Woburn,  
816 Maryland, USA) to a fragment length of ~550 bp (for an average insert size of ~420 bp). The  
817 remaining 134 libraries were constructed by Rapid Genomics (Gainesville, Florida, USA), with  
818 custom adapters. The Illumina i5 and i7 barcodes were used for all libraries. Target sequences  
819 can be accessed at <https://github.com/wickettlab/HybSeqFiles>.

820 Libraries were enriched for these loci using the MyBaits protocol (ArborBiosciences  
821 2016) with combined pools of libraries totaling 1.2 µg of DNA (12 libraries/pool at 100  
822 ng/library). Libraries with less than 100 ng of total recovered DNA were pooled together in  
823 equimolar concentrations using available product, resulting in some pools with less than 1.2 µg  
824 of DNA. The smallest successful pool contained four samples with 6 ng of library each.  
825 Hybridization was performed at 65°C for approximately 18 hours. The enriched libraries were

826 reamplified with 14 to 18 PCR cycles and a final cleanup was performed using a Qiagen  
827 QiaQuick PCR cleanup kit following the manufacturer's protocol to remove bead contamination  
828 (Qiagen, Venlo, Netherlands). DNA concentrations were measured using a Qubit 2.0  
829 Fluorometer (Life Technologies, Carlsbad, California, USA) and molarity was measured on an  
830 Agilent 2100 Bioanalyzer (Agilent Technologies, Santa Clara, California, USA). A final  
831 cleaning step using Dynabeads MyOne Streptavidin C1 magnetic beads was performed on pools  
832 with adapter contamination as detected on the Bioanalyzer. Pools were sequenced in four runs at  
833 equimolar ratios (4 nM), on an Illumina MiSeq (2 x 300 cycles, v3 chemistry; Illumina, Inc., San  
834 Diego, California, USA) at the Pritzker DNA lab (Field Museum, Chicago, IL, USA). This  
835 produced 80,273,296 pairs of 300-bp reads. Reads were demultiplexed and adapters trimmed  
836 automatically by Illumina Basespace (Illumina 2016). Raw reads have been deposited at the  
837 NCBI Sequence Read Archive (BioProject PRJNA544074).

838

### 839 *Quality Filtering, Assembly and Alignment*

840 A summary of read quality from each sample was produced using FastQC  
841 (<http://www.bioinformatics.babraham.ac.uk/people.html>), which revealed read-through adapter  
842 contamination in many of the poorer quality samples. To remove read-through contamination  
843 and filter for quality, reads were trimmed for known Illumina adapters using Trimmomatic  
844 (Bolger et al. 2014) with the following settings:  
845 ILLUMINACLIP:<illumina\_adapters.fasta>:2:30:10 LEADING:10 TRAILING:10  
846 SLIDINGWINDOW:4:20 MINLEN:20. Trimmed, quality-filtered reads were assembled using  
847 the HybPiper pipeline (Johnson et al. 2016) with default settings, followed by the intronrate.py  
848 script, to produce both exons and the "splash zone" flanking non-coding region-containing  
849 supercontigs. Only pairs with both mates surviving trimming and quality filtering were used for  
850 HybPiper.

851 To compare the influence of "splash-zone" non-coding regions, two sets of alignments  
852 were created: (1) exons alone, and (2) coding sequences plus the "splash-zone" (Hereby referred  
853 to as supercontigs). For multiple sequence alignments of exons alone, protein and nucleotide  
854 sequences assembled in HybPiper were gathered into fasta files by gene. For protein sequences  
855 only, stop codons were changed to "X" using a sed command-line regular expression to facilitate  
856 alignment, and sequences were aligned using MAFFT with settings: --auto --adjustdirection --  
857 maxiterate 1000 (Katoh et al. 2002). Aligned protein sequences were then used to fit unaligned  
858 nucleotide sequences into coding frame alignments using pal2nal with default settings (Suyama  
859 et al. 2006). In-frame, aligned DNA sequences were trimmed to remove low-coverage positions  
860 and sequences composed only of gaps using TrimAl with the automated setting, which is  
861 optimized for maximum likelihood analyses (Gutiérrez et al. 2009). For supercontigs, nucleotide  
862 sequences assembled using HybPiper were gathered into fasta files by gene, gene names were  
863 removed from fasta headers using a command-line regular expression, and sequences were  
864 aligned in MAFFT with settings: --auto --adjustdirection --maxiterate 1000 (Katoh et al. 2002).  
865 Reverse complement tags ("\_R\_") were removed from taxon names using a command-line  
866 regular expression, and sequences were trimmed using TrimAl with previously listed settings  
867 optimized for maximum likelihood analyses (Gutiérrez et al. 2009). To minimize the effects of  
868 missing data on phylogenetic analyses, accessions with < 50% of loci passing quality filtering  
869 were removed, and genes that were recovered across < 70% of the total remaining samples were  
870 also removed. Following quality filtering, we recovered 204 high quality loci (present in at least  
871 70% of samples) and an average of 625,323 reads per sample (S1). All pipelines and analyses

872 were run on the high-performance computing cluster at the Chicago Botanic Garden unless  
873 otherwise specified.

874

### 875 *Phylogenetic Reconstruction*

876 We conducted phylogenetic analyses using two strategies for each set of alignments.  
877 Alignments were concatenated and analyzed using maximum likelihood (ML) in RAxML  
878 (Stamatakis 2014; hereafter referred to as “concatenation”), whereas coalescent-based analyses  
879 were conducted using ML gene trees in ASTRAL-II (Mirarab and Warnow 2015; Sayyari and  
880 Mirarab 2016) and using unlinked SNPs in SVDquartets (Chifman and Kubatko 2014, 2015)  
881 implemented in PAUP\* beta version 4.0a168 (Swofford 2003; S3). In concatenation analyses,  
882 after aligning each gene separately in MAFFT, genes were concatenated, partitioned, and  
883 maximum likelihood trees were reconstructed in RAxML Version 8 (Stamatakis 2014) using the  
884 GTRCAT model with 100 “rapid-boostrapping” psuedoreplicates and *Chylismia scapoidea* as  
885 the outgroup, on the CIPRES Science Gateway computing cluster (Miller et al. 2010). For  
886 coalescent analyses, individual gene trees were first estimated using RAxML Version 8  
887 (Stamatakis 2014), with 100 “rapid-boostrapping” psuedo-replicates and settings: -p 12345 -x  
888 12345 -N 100 -c 25 -f a -m GTRCAT -s, and *Chylismia scapoidea* as the outgroup. Gene trees  
889 based on supercontigs were not partitioned by codon position. Coalescent-based analyses of  
890 accessions were conducted in ASTRAL-II (Mirarab and Warnow 2015; Sayyari and Mirarab  
891 2016) with default settings using the best RAxML gene trees and their associated bootstrap files  
892 as input, and in SVD Quartets (Chifman and Kubatko 2014, 2015) with default settings using an  
893 inframe aligned supermatrix with all 204 loci and supercontigs. ASTRAL-II and SVD Quartets  
894 analysis was performed with 100 multi-locus bootstraps.

895 To assess concordance among gene trees and provide additional support complementary  
896 to bootstrap values, we conducted two additional analyses. First, we assessed raw gene tree  
897 concordance using Phyparts (Smith et al. 2015). Prior to running Phyparts, nodes with < 33%  
898 support in the supercontig RAxML gene trees were collapsed using the sumtrees command in  
899 Dendropy (Sukumaran 2010). These gene trees were then re-rooted using *Chylismia scapoidea*  
900 as the outgroup and ASTRAL-II was rerun using these collapsed, re-rooted gene trees as the  
901 input files. Pie charts showing gene tree discordance were generated and overlaid on the  
902 resulting ASTRAL-II tree using the PhypartsPiecharts script  
903 (<https://github.com/mossmatters/phyloscripts/tree/master/phypartspiecharts>). Phyparts piecharts  
904 and gene tree concordance values were also added to Figure 1 by importing the two data files  
905 produced by the Phypartspiecharts.py into R and manually matching them to key nodes on our  
906 ASTRAL-II supercontig tree using *ggtree* version 1.14.6 (G Yu, DK Smith, H Zhu, Y Guan  
907 2017). We also generated gene and site concordance factors for our ASTRAL-II tree constructed  
908 using supercontigs in IQTree v1.7-beta16 (Minh et al. 2018). IQtree calculates the gene  
909 concordance factor (gCF) and accounts for incomplete taxon coverage among gene trees and  
910 therefore may provide a more accurate representation of agreement among gene trees than other  
911 methods. In addition to gCF, IQTree calculates the site concordance factor (sCF), which is  
912 defined as the percentage of decisive nucleotide sites supporting a specific node (Minh et al.  
913 2018). We used the RAxML gene trees produced for the ASTRAL-II supercontig analysis, and  
914 supercontig alignments themselves, as the inputs for IQtree. For computing sCF, we randomly  
915 sampled 100 quartets around each internal node. Finally, we mapped gCF and sCF values to the  
916 ASTRAL-II supercontig tree produced in our previous summary coalescent analysis (Fig. 2). All



917 phylogenetic trees, with the exception of the full Phyparts picharts tree, were visualized using the  
918 R package *ggtree* version 1.14.6 (G Yu, DK Smith, H Zhu, Y Guan 2017).

919

### 920 *Ancestral State Reconstruction*

921 To infer ancestral conditions and the number of transitions in reproductive system, we  
922 used the *phangorn* (Schliep 2011) package in R. First, a Coalescent-based species tree with  
923 accessions grouped into taxa using a mapping file was estimated in ASTRAL-III (Zhang et al.  
924 2018) with default settings using the best RAxML gene trees and their associated bootstrap files,  
925 from the supercontig alignments, as input. Next we time calibrated the ASTRAL-III species tree  
926 to 1 million years based on estimates of other taxa in the genus (Evans et al. 2009) using the  
927 *makeChronosCalib* function in the *ape* (Paradis et al. 2004) package in R, and estimated an  
928 ultrametric tree using the *chronos* function in *ape* (Paradis et al. 2004) with settings:  $\lambda = 1$ ,  
929  $\text{model} = \text{"relaxed"}$ . Finally, we performed marginal reconstruction of ancestral character states  
930 using the maximum likelihood method using the *optim.pml* and *ancestral.pml* functions in the  
931 *phangorn* (Schliep 2011) package in R.

932

### 933 *Testing for Hybrid Origins with HyDe*

934 To test for putative hybrid origins of selected taxa, we used HyDe (Blischak et al. 2018)  
935 to calculate D-Statistics (Green et al. 2010) for a set of hypotheses (S10). Briefly, HyDe  
936 considers a four-taxon network of an outgroup and a triplet of ingroup populations to detect  
937 hybridization from phylogenetic invariants that arise under the coalescent model with  
938 hybridization. Introgression between P3 and either P1 or P2 influences the relative frequencies of  
939 ABBA and BABA, and the D-statistic measures the imbalance between these frequencies. We  
940 tested the triplets in (S10) and set *Chylismia scapoidea* as the outgroup. We considered  
941 hypothesis tests significant at an overall  $\alpha < 0.05$  level with estimates of  $\gamma$  between 0 and 1. Z-  
942 scores greater than 3 are generally interpreted as strong evidence of introgression.

943

### 944 *Population-level Analysis*

945 To further characterize population-level processes or genetic structure within sect.  
946 *Calylophus*, we extracted and filtered SNPs by mapping individual reads against reference  
947 supercontigs (see <https://github.com/lindsawi/HybSeq-SNP-Extraction>). To account for  
948 duplicates arising from PCR during HybSeq in SNP calling and filtering, first we selected the  
949 sample with the highest target recovery rate and sequencing depth as a target reference sequence  
950 (*Oenothera capillifolia berlandieri\_bjc19*) and gathered supercontigs for this individual into a  
951 single target FASTA file. We then ran BWA (Li and Durbin 2009) to align sequences, Samtools  
952 ‘index’ (Danecek et al. 2011) and GATK CreateSequenceDictionary (Poplin et al. 2017),  
953 respectively, on the resulting target FASTA file. Next we ran a custom script  
954 “variant\_workflow.sh” using both read files from each *Calylophus* sample as input to create a  
955 vcf file for each sample. SNP’s were called for each individual using GATK (Poplin et al. 2017)  
956 and the vcf file from each sample as input. The resulting vcf file created in the previous step was  
957 filtered to remove indels using GATK and the original target FASTA file as input, and then  
958 filtered again based on read mapping and quality with GATK VariantFiltration with settings: --  
959 filterExpression "QD < 5.0 || FS > 60.0 || MQ < 40.0 || MQRankSum < -12.5 || ReadPosRankSum  
960 < -8.0" (Poplin et al. 2017). We generated a reduced SNP file using PLINK (Purcell et al. 2007)  
961 to remove SNPs that did pass filter using the command: `plink --vcf-filter --vcf input.vcf --const-  
962 fid --allow-extra-chr --geno --make-bed --recode structure`. Finally we used Discriminant

963 Analysis of Principal Components (Jombart et al. 2010) as implemented in the R package  
964 *adeigenet* (Jombart 2008) and the *snmf* function in the LEA package (Frichot and François 2015)  
965 in R (R Core Team, 2020) to identify genetic structure between and among individuals and  
966 populations in our data.

967

#### 968 *Morphological Measurements and Analysis*

969 To assess taxon boundaries and patterns of morphological variation, we measured  
970 character states for the following key morphological structures that have been used historically to  
971 discriminate taxa in sect. *Calylophus* (Towner 1977): plant height, leaf length (distal), leaf width  
972 (distal), leaf length/width ratio (distal), leaf length (basal), leaf width (basal), leaf length/width  
973 (basal), sepal length, and sepal tip length. Measurements were made with digital calipers when  
974 possible, or with a standard metric ruler and dissecting scope, from voucher specimens of nearly  
975 all sampled populations of sect. *Calylophus* included in our molecular phylogenetic analyses.  
976 Measurements are provided in S11. Morphological measurements were log transformed using  
977 the R base function ‘log’ (R Core Team 2018) prior to Principal Components Analysis (PCA),  
978 which was conducted in R using the *stats* package version 3.7 and the function ‘prcomp’ (R Core  
979 Team 2018). All ‘NA’ values were omitted from analysis. Plots of PCA results were visualized  
980 using the *ggplot2* package in R (Wickham 2016).

981

#### 982 REFERENCES

- 983 Abascal F., Zardoya R., Telford M.J. 2010. TranslatorX: Multiple alignment of nucleotide  
984 sequences guided by amino acid translations. *Nucleic Acids Res.* 38:7–13.
- 985 Alexander M.P. 1969. Differential Staining of Aborted and Nonaborted Pollen. *Stain Technol.*  
986 44:117–122.
- 987 Alexander M.P. 1980. A Versatile Stain for Pollen Fungi, Yeast and Bacteria. *Stain Technol.*  
988 55:13–18.
- 989 ArborBiosciences. 2016. In-Solution Sequence Capture for Targeted High-Throughput  
990 Sequencing: Version 3.02. .
- 991 Blischak P.D., Chifman J., Wolfe A.D., Kubatko L.S. 2018. HyDe: A python package for  
992 genome-scale hybridization detection. *Syst. Biol.* 67:821–829.
- 993 Bolger A.M., Lohse M., Usadel B. 2014. Trimmomatic: A flexible trimmer for Illumina  
994 sequence data. *Bioinformatics.* 30:2114–2120.
- 995 Chifman J., Kubatko L. 2014. Quartet inference from SNP data under the coalescent model.  
996 *Bioinformatics.* 30:3317–3324.
- 997 Chifman J., Kubatko L. 2015. Identifiability of the unrooted species tree topology under the  
998 coalescent model with time-reversible substitution processes, site-specific rate variation,  
999 and invariable sites. *J. Theor. Biol.* 374:35–47.
- 1000 Danecek P., Auton A., Abecasis G., Albers C.A., Banks E., DePristo M.A., Handsaker R.E.,  
1001 Lunter G., Marth G.T., Sherry S.T., McVean G., Durbin R. 2011. The variant call format  
1002 and VCFtools. *Bioinformatics.* 27:2156–2158.
- 1003 Doyle J.J. 1987. A Rapid DNA Isolation Procedure for Small Quantities of Fresh Leaf Tissue.  
1004 *Phytochem Bull.*:11–15.
- 1005 Duarte J.M., Wall P.K., Edger P.P., Landherr L.L., Ma H., Pires J.C., Leebens-Mack J.,  
1006 dePamphilis C.W. 2010. Identification of shared single copy nuclear genes in *Arabidopsis*,  
1007 *Populus*, *Vitis* and *Oryza* and their phylogenetic utility across various taxonomic levels.  
1008 *BMC Evol Biol.* 10:61.

- 1009 Evans M.E.K., Smith S. a, Flynn R.S., Donoghue M.J. 2009. Climate, niche evolution, and  
1010 diversification of the “bird-cage” evening primroses (*Oenothera*, sections *Anogra* and  
1011 *Kleinia*). *Am. Nat.* 173:225–40.
- 1012 G Yu, DK Smith, H Zhu, Y Guan T.L. 2017. ggtree: an R package for visualization and  
1013 annotation of phylogenetic trees with their covariates and other associated data. *Methods*  
1014 *Ecol. Evol.*:28–36.
- 1015 Green R., Krause J., Briggs A., Rasilla Vives M., Fortea Pérez F. 2010. A draft sequence of the  
1016 neandertal genome. *Science* (80-. ). 328:710–722.
- 1017 Gutiérrez S.C., Martínez J.M.S., Gabaldón T. 2009. TrimAl : a tool for automatic alignment  
1018 trimming. *Bioinformatics.*:1–2.
- 1019 Illumina. 2016. BaseSpace Sequence Hub. Available from <https://basespace.illumina.com/>.
- 1020 Johnson M.G., Gardner E.M., Liu Y., Medina R., Goffinet B., Shaw A.J., Zerega N.J.C., Wickett  
1021 N.J. 2016. HybPiper: Extracting Coding Sequence and Introns for Phylogenetics from High-  
1022 Throughput Sequencing Reads Using Target Enrichment. *Appl. Plant Sci.* 4:1600016.
- 1023 Katoh K., Misawa K., Kuma K., Miyata T. 2002. MAFFT: a novel method for rapid multiple  
1024 sequence alignment based on fast Fourier transform. *Nucleic Acids Res.* 30:3059–3066.
- 1025 Li H., Durbin R. 2009. Fast and accurate short read alignment with Burrows-Wheeler transform.  
1026 *Bioinformatics.* 25:1754–1760.
- 1027 Miller M.A., Pfeiffer W., Schwartz T. 2010. Creating the CIPRES Science Gateway for  
1028 inference of large phylogenetic trees. 2010 Gatew. Comput. Environ. Work. GCE 2010.
- 1029 Minh B.Q., Hahn M.W., Lanfear R. 2018. New methods to calculate concordance factors for  
1030 phylogenomic datasets. *bioRxiv.*:487801.
- 1031 Mirarab S., Warnow T. 2015. ASTRAL-II: Coalescent-based species tree estimation with many  
1032 hundreds of taxa and thousands of genes. *Bioinformatics.* 31:i44–i52.
- 1033 Paradis E., Claude J., Strimmer K. 2004. APE: Analyses of phylogenetics and evolution in R  
1034 language. *Bioinformatics.* 20:289–290.
- 1035 Poplin R., Ruano-Rubio V., DePristo M.A., Fennell T.J., Carneiro M.O., Auwera G.A. Van der,  
1036 Kling D.E., Gauthier L.D., Levy-Moonshine A., Roazen D., Shakir K., Thibault J.,  
1037 Chandran S., Whelan C., Lek M., Gabriel S., Daly M.J., Neale B., MacArthur D.G., Banks  
1038 E. 2017. Scaling accurate genetic variant discovery to tens of thousands of samples.  
1039 *bioRxiv.*:201178.
- 1040 Purcell S., Neale B., Todd-Brown K., Thomas L., Ferreira M.A.R., Bender D., Maller J., Sklar  
1041 P., De Bakker P.I.W., Daly M.J., Sham P.C. 2007. PLINK: A tool set for whole-genome  
1042 association and population-based linkage analyses. *Am. J. Hum. Genet.* 81:559–575.
- 1043 R Core Team. 2018. R: A language and environment for statistical computing. .
- 1044 Sayyari E., Mirarab S. 2016. Fast coalescent-based computation of local branch support from  
1045 quartet frequencies. *Mol. Biol. Evol.*:msw079.
- 1046 Schliep K.P. 2011. phangorn: Phylogenetic analysis in R. *Bioinformatics.* 27:592–593.
- 1047 Sharma P., Purohit S.D. 2012. An improved method of DNA isolation from polysaccharide rich  
1048 leaves of *Boswellia serrata* Roxb. *Indian J. Biotechnol.* 11:67–71.
- 1049 Smith S.A., Moore M.J., Brown J.W., Yang Y. 2015. Analysis of phylogenomic datasets reveals  
1050 conflict, concordance, and gene duplications with examples from animals and plants. *BMC*  
1051 *Evol. Biol.* 15:150.
- 1052 Stamatakis A. 2014. RAxML version 8 a tool for phylogenetic analysis and post-analysis of large  
1053 phylogenies. *Bioinformatics* 30(9):1312-1313.
- 1054 Sukumaran J. and M.T.H. 2010. DendroPy: A Python library for phylogenetic computing.

- 1055           Bioinformatics.:1569–1571.
- 1056    Suyama M., Torrents D., Bork P. 2006. PAL2NAL: Robust conversion of protein sequence  
1057           alignments into the corresponding codon alignments. *Nucleic Acids Res.* 34:609–612.
- 1058    Towner H.F.. 1977. The Biosystematics of *Calylophus* ( Onagraceae ). *Ann. Missouri Bot. Gard.*  
1059           64:48–120.
- 1060    Wickham H. 2016. *ggplot2: Elegant Graphics for Data Analysis*. Springer-Verlag.
- 1061    Zhang C., Rabiee M., Sayyari E., Mirarab S. 2018. ASTRAL-III: polynomial time species tree  
1062           reconstruction from partially resolved gene trees. *BMC Bioinformatics.* 19:153.

1063 S4

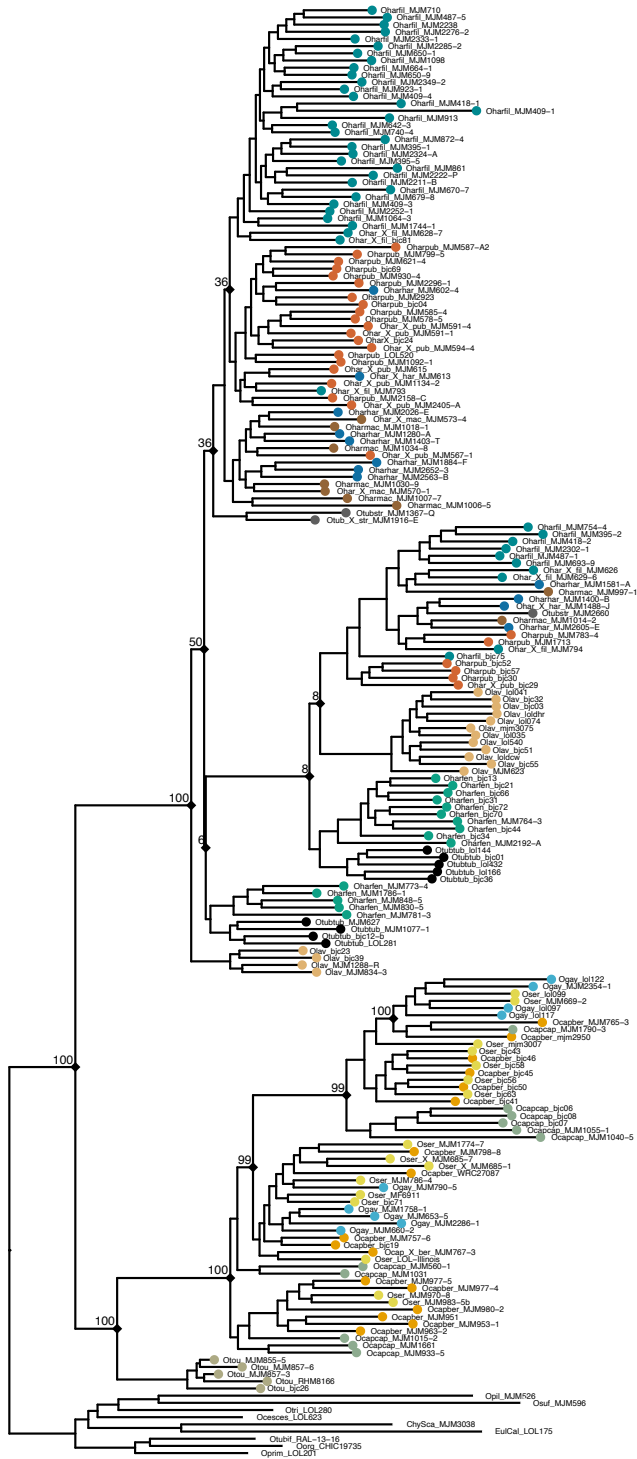

1064  
1065 Concatenation tree constructing using the exon-only dataset and 100 bootstraps. Bootstrap values  
1066 indicated at relevant nodes.

1067 S5

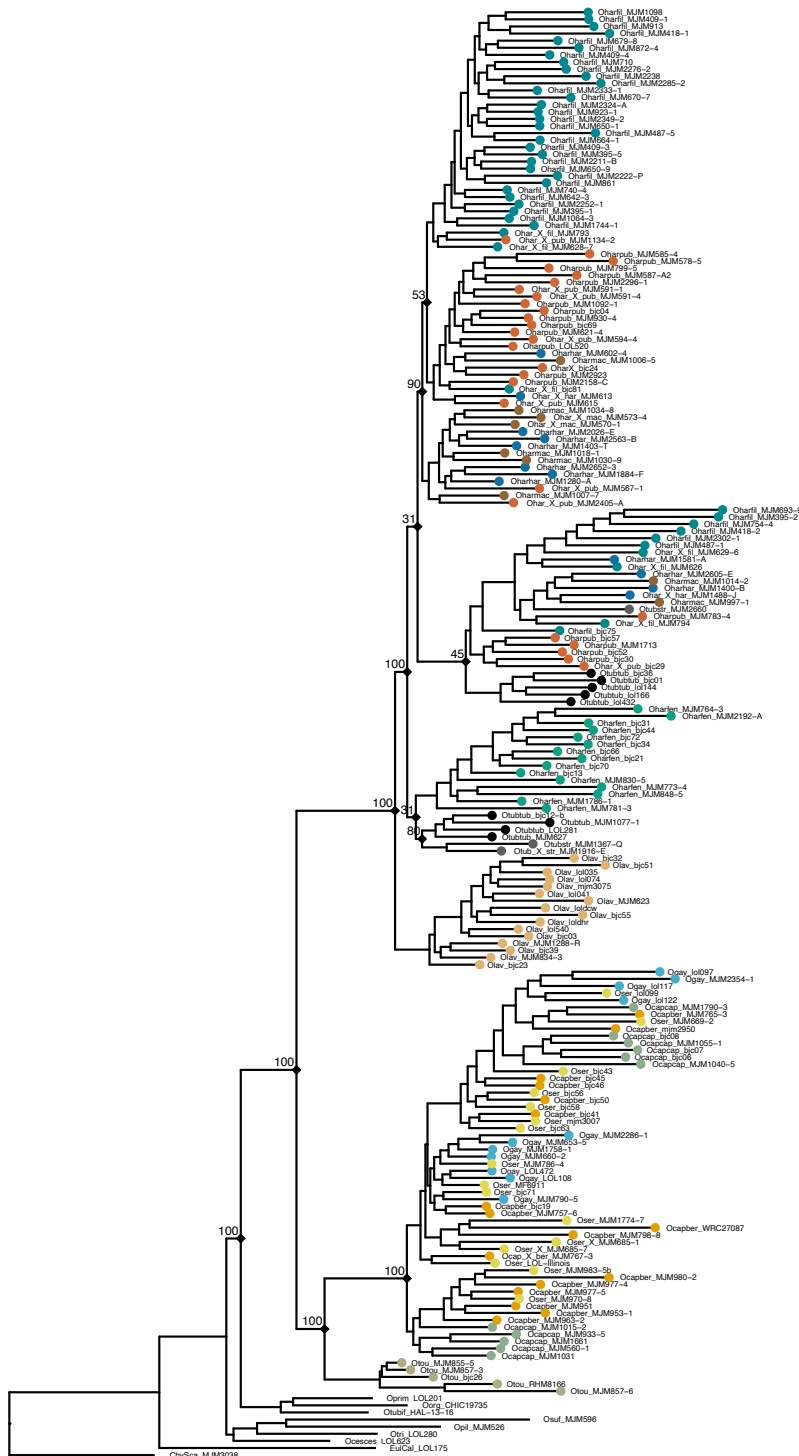

1068

1069

Concatenation tree constructing using the supercontig dataset and 100 bootstraps. Bootstrap values indicated at relevant nodes.

1070

1071 S6

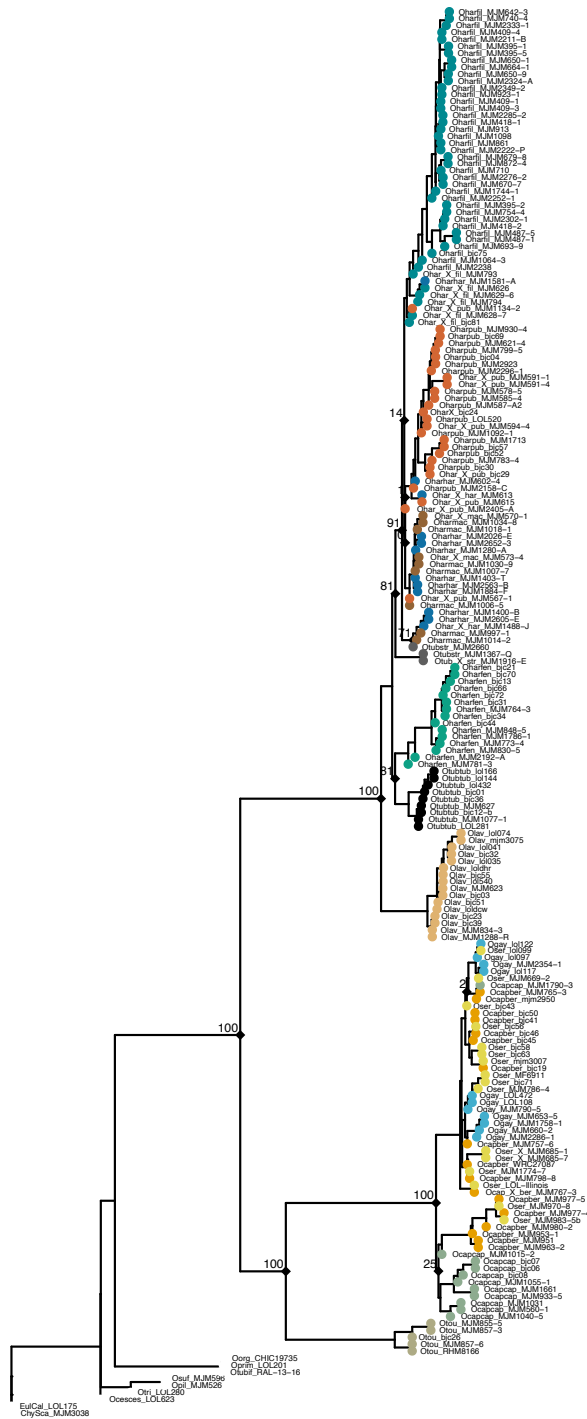

1072  
1073 ASTRAL-II summary coalescent tree constructing using the exon-only dataset and 100  
1074 bootstraps. Bootstrap values indicated at relevant nodes.

1075 S7

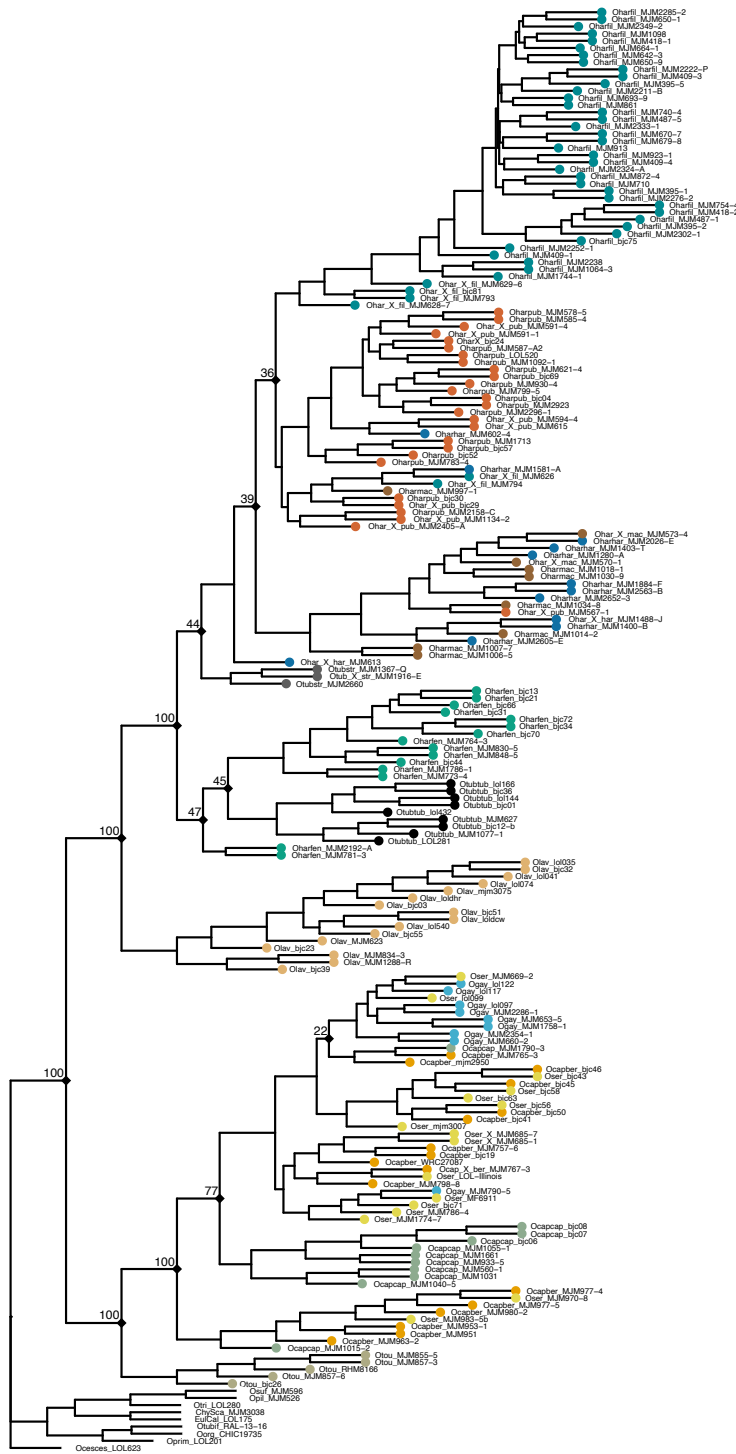

1076

1077 SVD Quartets summary coalescent tree constructing using the supercontig dataset with 100

1078 bootstraps. Bootstrap values indicated at relevant nodes.



1079 S8

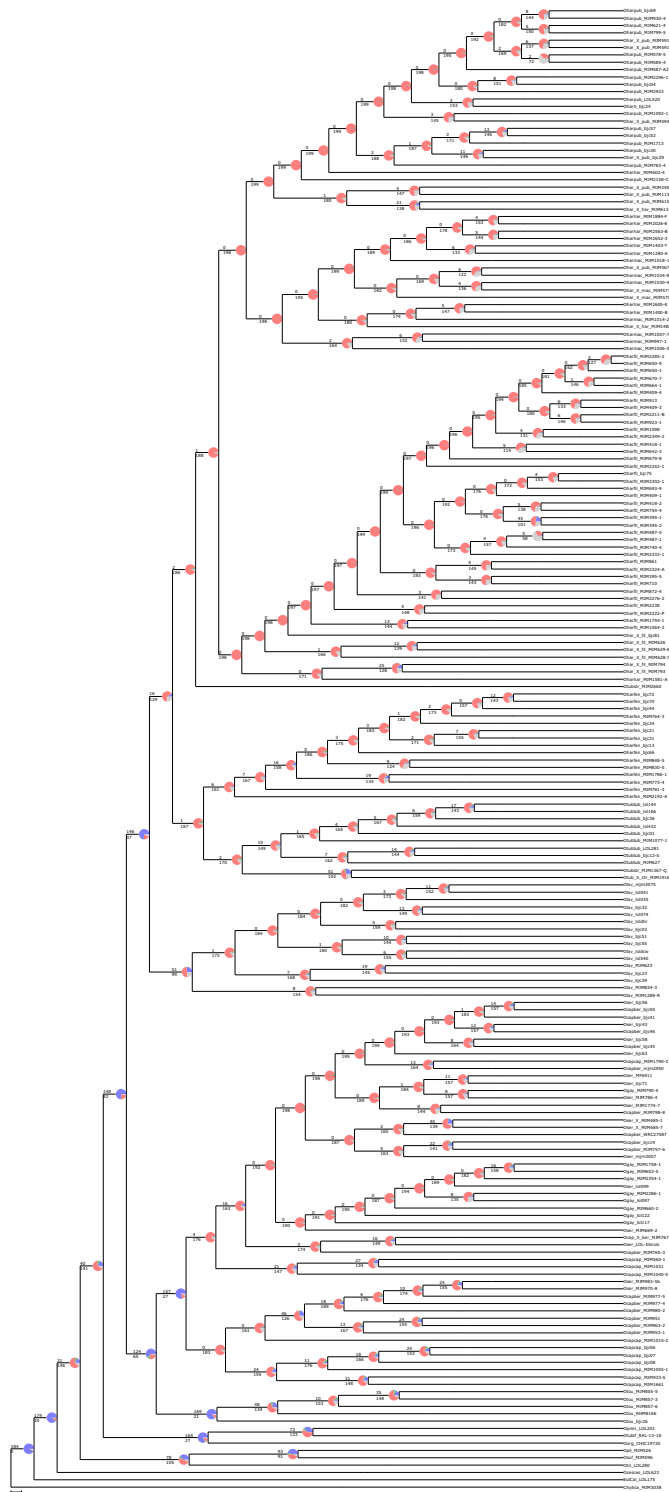

1080  
1081  
1082  
1083  
1084

PhyParts piecharts ASTRAL-II tree constructing using the supercontig dataset. Piechart colors correspond to: blue = concordant, green = top alternative bipartition, red = all other alternative bipartitions, black = uninformative for that node.

1085 S9

1086 Summary of support values for current and proposed taxonomic treatments, by analysis. ‘e’  
 1087 signifies trees based on exon-only data, “e+i” signifies trees based on supercontigs. ‘p’ indicates  
 1088 paraphyletic, unsupported taxon treatment according to tree topology.

| Taxon                                                                                                   | Concat. e | Concat. e+i | ASTRAL-II e | ASTRAL-II e+i | SVDQ e+i | Phyparts | gCF iQtree e+i | sCF iQtree e+i |
|---------------------------------------------------------------------------------------------------------|-----------|-------------|-------------|---------------|----------|----------|----------------|----------------|
| a. <i>Oenothera hartwegii</i> (Towner 1977)                                                             | p         | p           | p           | p             | p        | p        | p              | p              |
| b. <i>Oenothera hartwegii</i> subsp. <i>fendleri</i> (Towner 1977)                                      | <50       | p           | 81          | 99            | p        | 1/ 188   | 1              | 38             |
| c. <i>Oenothera hartwegii</i> subsp. <i>filifolia</i> (Towner 1977)                                     | p         | p           | <50         | <50           | <50      | 1/ 190   | 0              | 36             |
| d. <i>Oenothera hartwegii</i> subsp. <i>hartwegii</i> (Towner 1977)                                     | p         | p           | p           | p             | p        | p        | p              | p              |
| e. <i>Oenothera hartwegii</i> subsp. <i>macartii</i> (Towner 1977)                                      | p         | p           | p           | p             | p        | p        | p              |                |
| f. <i>Oenothera hartwegii</i> subsp. <i>hartwegii</i> + subsp. <i>macartii</i>                          | p         | p           | <50         | <50           | <50      | 0/ 200   | 0              | 33             |
| g. <i>Oenothera hartwegii</i> subsp. <i>pubescens</i> (Towner 1977)                                     | p         | p           | <50         | <50           | <50      | 0/ 200   | 0              | 36             |
| h. <i>Oenothera lavandulifolia</i> (Towner 1977)                                                        | 100       | p           | 100         | 100           | 100      | 147/37   | 74             | 83             |
| i. <i>Oenothera tubicula</i> (Towner 1977)                                                              | p         | p           | p           | p             | p        | 1/ 188   | p              | p              |
| j. <i>Oenothera tubicula</i> subsp. <i>tubicula</i> (Towner 1977)                                       | p         | p           | 81          | 99            | <50      | 2/ 171   | 1              | 38             |
| k. <i>Oenothera tubicula</i> subsp. <i>strigulosa</i> (Towner 1977)                                     | p         | p           | 81          | 100           | <50      | p        | 0              | 37             |
| l. <i>Oenothera fendleri</i> + <i>Oenothera tubicula</i> subsp. <i>tubicula</i>                         | p         | p           | 100         | 100           | <50      | 16/129   | 10             | 40             |
| m. <i>Oenothera toumeyi</i> (Towner 1977)                                                               | 100       | 100         | 100         | 100           | 100      | 125/65   | 62             | 56             |
| n. <i>Oenothera toumeyi</i> + subsect. <i>Calylophus</i>                                                | 100       | 100         | 100         | 100           | 100      | 149/42   | 76             | 65             |
| o. <i>Oenothera capillifolia</i> (Towner 1977)                                                          | p         | p           | p           | p             | p        | p        | p              | p              |
| p. <i>Oenothera capillifolia</i> subsp. <i>capillifolia</i> (Towner 1977)                               | p         | p           | <50         | p             | <77      | p        | p              | p              |
| q. <i>Oenothera capillifolia</i> subsp. <i>berlandieri</i> (Towner 1977)                                | p         | p           | p           | p             | p        | p        | p              | p              |
| r. <i>Oenothera capillifolia</i> subsp. <i>berlandieri</i> (New Taxon; South Texas coastal populations) | p         | p           | <50         | 100           | 100      | 157/27   | 79             | 86             |
| s. <i>Oenothera serrulata</i> (Towner 1977)                                                             | p         | p           | p           | p             | p        | p        | p              | p              |
| t. <i>Oenothera ‘australis’</i> (New Taxon; South Texas <i>O. serrulata</i> )                           | p         | 100         | p           | p             | p        | 10/175   | p              | p              |
| u. <i>Oenothera gayleana</i> (Turner & Moore 2014)                                                      | p         | p           | p           | p             | p        | p        | p              | p              |
| v. <i>Oenothera gayleana</i> (Revised Taxon)                                                            | p         | p           | p           | <50           | <50      | 0/ 193   | 0              | 35             |

1089 **S10**

1090 List of admixture hypotheses tested, Zscore, P-value and Gamma results from HyDe analysis.  
 1091 Each row represents a triplet set that was tested consisting of a putative hybrid individual and  
 1092 two parent groups; Parent 1 and Parent 2.  
 1093

| Putative hybrid individuals | Parent 1 Group     | Parent 2 Group              | Zscore   | P        | Gamma    |
|-----------------------------|--------------------|-----------------------------|----------|----------|----------|
| Ohar_X_fil_MJM629.6         | CoreOharfil        | CoreOharpub                 | -99999.9 | 1        | -0.049   |
| Ohar_X_fil_MJM628           | CoreOharfil        | CoreOharpub                 | -99999.9 | 1        | -0.057   |
| Ohar_X_fil_MJM626           | CoreOharfil        | CoreOharpub                 | -99999.9 | 1        | -0.001   |
| Ohar_X_fil_MJM793           | CoreOharfil        | CoreOharpub                 | -99999.9 | 1        | -0.057   |
| Ohar_X_fil_MJM794           | CoreOharfil        | CoreOharpub                 | -99999.9 | 1        | -0.034   |
| Ohar_X_fil_BJC81            | CoreOharfil        | CoreOharpub                 | -99999.9 | 1        | -0.042   |
| Oharhar_MJM1581             | CoreOharpub        | Oharhar/harmac              | -99999.9 | 1        | 1.706    |
| Ohar_X_pub_BJC29            | CoreOharpub        | Oharhar/harmac              | 2.378    | 0.009**  | 0.338    |
| Oharpub_BJC30               | CoreOharpub        | Oharhar/harmac              | -99999.9 | 1        | -0.215   |
| Oharpub_MJM2158.C           | CoreOharpub        | Oharhar/harmac              | 1.113    | 0.133    | 0.229    |
| Ohar_X_pub_MJM1134.2        | CoreOharpub        | Oharhar/harmac              | 0.043    | 0.483    | 0.015    |
| Ohar_X_pub_MJM2405.A        | CoreOharpub        | Oharhar/harmac              | 0.882    | 0.189    | 0.158    |
| Ohar_X_pub_MJM594.4         | CoreOharpub        | Oharhar/harmac              | 2.094    | 0.018*   | 0.332    |
| Ohar_X_pub_MJM615           | CoreOharpub        | Oharhar/harmac              | 0.413    | 0.340    | 0.096    |
| Oharmac_MJM997.1            | CoreOharpub        | Oharhar/harmac              | 1.563    | 0.059    | 0.224    |
| Ohar_X_har_MJM613           | CoreOharpub        | Oharhar/harmac              | -99999.9 | 1        | -0.495   |
| Otub_X_str_MJM1916.E        | Otubtub            | Oharhar/harmac              | 5.585    | 0.000*** | 0.947    |
| Oharfen_MJM2192.A           | CoreOharfen        | CoreOharfil                 | 0.305    | 0.380    | 0.001    |
| Oharfen_MJM781.3            | CoreOharfen        | CoreOharpub                 | 0.025    | 0.490    | 9.69E-05 |
| Ocapcap_MJM1015.2           | CoreOcapcap        | S. TX Ocapber               | 0.467    | 0.320    | 0.003    |
| Ocap_X_ber_MJM767.3         | central OK Ocapber | Pecos River/Southern Plains | -99999.9 | 1        | -0.003   |

• Indicates value meets significance threshold of  $P < 0.05$   
 \*\* Indicates value meets significance threshold of  $P < 0.001$   
 \*\*\* Indicates value meets significance threshold of  $P < 0.0001$

1094

1095 **S11**

1096 See excel table “S11 Morphometric Data”  
 1097

1098 **S12**

1099 See excel table “S12 Pollen Counts”  
 1100

1101 **S13**

1102 DNA EXTRACTION PROTOCOL – see additional file

1103 S14

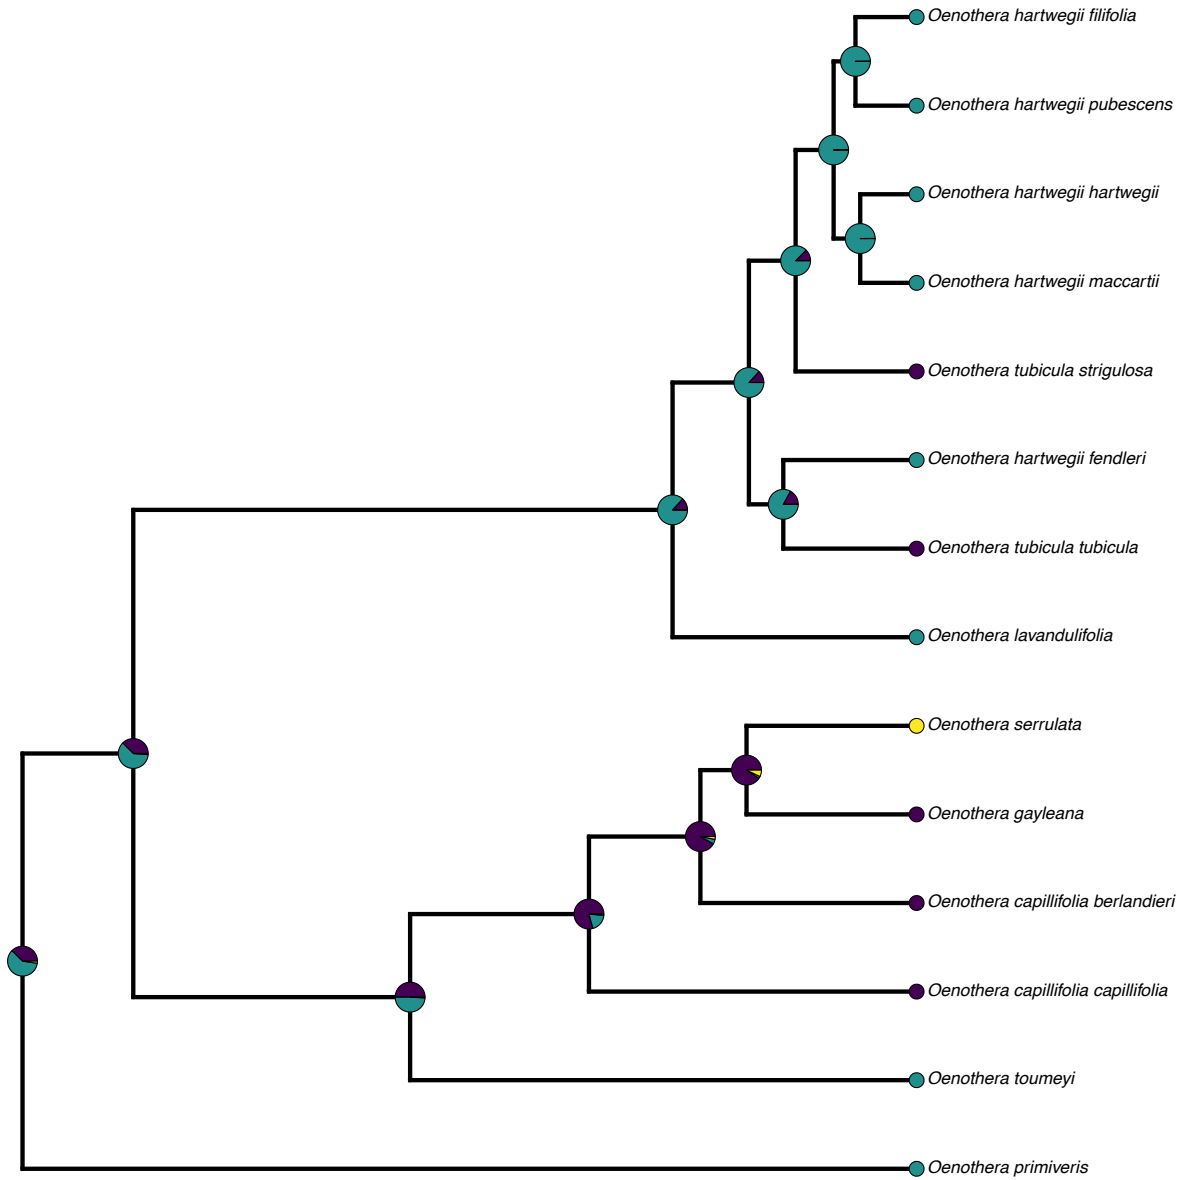

1104  
1105 Ancestral State Reconstruction of reproductive system in sect. *Calylophus* using supercontigs  
1106 and accessions grouped into taxa. Pie-charts on nodes represent likelihood of ancestral  
1107 reproductive system at each node (teal = hawkmoth pollination, purple = bee pollination, yellow  
1108 = PTH).
